# Supplementary material for: Modeling students’ epistemic cognition in undergraduate chemistry courses: a review
Source: Royal Society of Chemistry journal article supplement (doi:10.1039/d3rp00348e), 2024-01-01
Supplement: d3rp00348e1.xlsx [file d3rp00348e1.xlsx]

## Sheet: Summary
	Initial Hits
		J Chem Ed	CERP	JRST	Sci Ed	Int Sci Ed	Taylor & Francis	ERIC	Total
		210	301	82	9	130	102	106	940
	FIRST PASS
		J Chem Ed	CERP	JRST	Sci Ed	Int Sci Ed	Taylor & Francis	ERIC	Total
	Yes	24	46	5	0	11	7	28	121
	Maybe	12	15	6	0	5	0	3	41
	No	142	191	37	5	72	45	39	531
	Repeat	32	49	34	4	42	50	36	247
	Total	210	301	82	9	130	102	106	940	693 unique hits
	SECOND PASS
		J Chem Ed	CERP	JRST	Int Sci Ed	Databases	Total
	Yes	18	40	10	6	34	108
	Maybe	6	9	0	4	0	19
	No	13	12	1	6	4	36
	Total	37	61	11	16	38	163
	THIRD PASS
		Total
	Yes	59
	Maybe	29
	No	39
	Total	127
	FOURTH PASS
		Total
	Yes	54
	No	35
	Total	89

## Sheet: Search Parameters
	Total Papers	940
	Yes	121
	Maybe	41
	Journal of Chemical Education					Chemistry Education Research and Practice					Journal of Research in Science Teaching					Science Education					International Journal of Science Education					Taylor & Francis					ERIC
	Total Hits	210				Total Hits	301				Total Hits	82				Total Hits	9				Total Hits	130				Total Hits	102				Total Hits	106
	Yes	24				Yes	46				Yes	5				Yes	0				Yes	11				Yes	7				Yes	28
	Maybe	12				Maybe	15				Maybe	6				Maybe	0				Maybe	5				Maybe	0				Maybe	3
	No	142				No	191				No	37				No	5				No	72				No	45				No	39
	Repeat	32				Repeat	49				Repeat	34				Repeat	4				Repeat	42				Repeat	50				Repeat	36
	Search Updated	2022-09-02				Search Updated	2022-09-01				Search Updated					Search Updated					Search Updated	2022-09-05				Search Updated	2022-09-08				Search Updated	2022-09-06
	Search Parameters					Search Parameters					Search Parameters					Search Parameters					Search Parameters					Search Parameters					Search Parameters
	Term	epistem*	(anywhere)			Term	epistem*	(anywhere)			Term	chemistry (keyword)				Term	chemistry (keyword)				Term	chemistry (keyword)				Term	chemistry (keyword)				Search term	chemistry AND epistemology
	Range	Jan 2000 - Sept 2022				Range	within last 22 years					epistem* (anywhere)					epistem* (anywhere)					epistem* (anywhere)				Filter	epistem* (anywhere)				Range	2000 - 2022
	Filter	Chemical Education Research				Filter	Content type - journal				Range	Jan 2000 - Aug 2022				Range	Jan 2000 - Aug 2022				Range	2000 - 2022					Article Type	Article			Filter	Education Level	Higher Education
	Return	52					Article type - paper				Return	22				Return	3				Return	36					Subject	Education				Publication Type	Journal articles
	Sorted	Yes	11			Return	170				Sorted	Yes	5			Sorted	Yes	0			Sorted	Yes	7			Range	2000 - 2022				Return	55
		Maybe	5			Sorted	Yes	33				Maybe	2				Maybe	0				Maybe	1			Return	57				Sorted	Yes	14
		No	36				Maybe	9				No	15				No	3				No	28			Sorted	Yes	3				Maybe	2
							No	128																			Maybe	0				No	21
																											No	18				Repeat	18
	Search Updated	2022-09-02									Search Updated					Search Updated					Search Updated	2022-09-05					Repeat	36
	Search Parameters					Search Updated	2022-09-01				Search Parameters					Search Parameters					Search Parameters
	Term	"nature of science"	(anywhere)			Search Parameters					Term	chemistry (keyword)				Term	chemistry (keyword)				Term	chemistry (keyword)									Search Updated	2022-09-02
	Range	Jan 2000 - Sept 2022				Term	"nature of science" (anywhere)	(anywhere)				"nature of science" (anywhere)					"nature of science" (anywhere)					"nature of science" (anywhere)				Search Updated					Search Parameters
	Filter	Chemical Education Research				Range	within last 22 years				Range	Jan 2000 - Aug 2022				Range	Jan 2000 - Aug 2022				Range	2000 - 2022				Search Parameters					Term	chemistry AND "nature of science"	(anywhere)
	Return	23				Filter	Content type - journal				Return	14				Return	1				Filter	Article Type	Article			Term	chemistry (keyword)				Range	2000 - 2022
	Sorted	Yes	1				Article type - paper				Sorted	Yes	0			Sorted	Yes	0			Return	17					"nature of science" (anywhere)				Filter	Higher Education
		Maybe	1			Return	114					Maybe	0				Maybe	0			Sorted	Yes	1			Range	2000 - 2022					Publication Type	Journal articles
		No	11			Sorted	Yes	13				No	4				No	1				Maybe	0			Filter	Article Type	Article			Return	51
		Repeat	10				Maybe	6				Repeat	10				Repeat	0				No	8			Return	40				Sorted	Yes	14
							No	55														Repeat	8			Sorted	Yes	4				Maybe	1
							Repeat	40																			Maybe	0				No	18
	Search Updated	2022-09-02									Search Updated					Search Updated											No	25				Repeat	18
	Search Parameters										Search Parameters					Search Parameters					Search Updated	2022-09-05					Repeat	11
	Term	belief*	(anywhere)			Search Updated	2022-09-01				Term	chemistry (keyword)				Term	chemistry (keyword)				Search Parameters
	Range	Jan 2000 - August 2022				Search Parameters						belief* (anywhere)					belief* (anywhere)				Term	chemistry (keyword)									Search Updated	2022-09-06
	Filter	Chemical Education Research				Term	belief	(title)			Range	Jan 2000 - Aug 2022				Range	Jan 2000 - Aug 2022					belief* (anywhere)				Search Updated	2022-09-09				Search Parameters
	Return	135				Range	within last 22 years				Return	46				Return	5				Range	2000 - 2022				Search Parameters					Term	chemistry AND belief	(anywhere)
	Sorted	Yes	12			Filter	Content type - journal				Sorted	Yes	0			Sorted	Yes	0			Return	77				Term	chemistry (keyword)				Range	2000 - 2022
		Maybe	6			Return	17					Maybe	4				Maybe	0			Sorted	Yes	3				belief* (title)				Filter	Higher Education
		No	95			Sorted	Yes	0				No	18				No	1				Maybe	4			Range	2000 - 2022					Publication Type	Journal articles
		Repeat	22				Maybe	0				Repeat	24				Repeat	4				No	36			Filter	Article Type	Article			Return	149
							No	8														Repeat	34				Subject	Education			Sorted	Yes
							Repeat	9																		Return	5					Maybe
																										Sorted	Yes	0				No
																											Maybe	0				Repeat
																											No	2
																											Repeat	3

## Sheet: JCE - Initial Hits
epistem*						nature of science						belief*
Hit	Article	Include?	If no, why?			Hit	Article	Include?	If no, why?			Hit	Article	Include?	If no, why?
1	Pazinato et al., 2021	Yes				1	An & Holme, 2021	Repeat				1	Wheeler et al., 2017	Repeat
2	Mazzarone & Grove, 2013	Yes				2	Herrington et al. 2012	No	HS			2	Mutambuki & Fynewever, 2012	No	Faculty
3	Lazenby et al., 2020	Yes				3	Cetin, 2021	No	HS			3	Cheung, 2011	No	HS
4	Hosbein et al., 2021	Yes				4	Franco-Mariscal et al., 2016	Repeat				4	Atieh et al., 2021	Yes
5	Aguirre-Mendez et al., 2020	Maybe				5	DeKorver & Towns, 2015	Maybe	Student goals for gen chem lab			5	Fox & Roehrig, 2015	No	Faculty
6	Criswell & Rushton, 2012	Maybe				6	Walker et al., 2019	Repeat				6	Pratt & Yezierski, 2019	Yes
7	Grooms, 2020	Yes				7	Dass et al., 2015	Repeat	HS			7	Chan & Bauer, 2014	Repeat
8	Atieh & York, 2020	Yes				8	Lazenby et al., 2020	Repeat				8	Rupnow et al., 2020	No	Faculty
9	Wink, 2020	No	Passing mention of epistemology.			9	Davila & Talanquer, 2010	No	Types of textbook problems			9	Bancroft et al., 2021	No	Review
10	Park et al., 2020	No	Passing mention of epistemology.			10	Zane & Tucci, 2016	Repeat				10	Szozda et al., 2022	No	Faculty
11	Cranwell & Whiteside, 2020	No	Super super linguistics-y			11	Grooms, 2020	Repeat				11	Nielsen & Yezierski, 2015	No	HS
12	Rodriguez et al., 2020	No	Uses conceptual resources, makes passing reference to epistemological resources			12	Kellamis & Yezierski, 2019	No	NGSS rubric			12	Stains et al., 2015	No	Faculty
13	Hosbein et al., 2021	Maybe	Passing mention of epistemology.			13	Allen et al., 2021	No	NoS in lit review			13	Pratt & Yezierski, 2019	No	Beliefs are in other paper
14	Lazenby et al., 2021	No	OMC primer			14	Bretz et al., 2013	No	Faculty			14	Graham et al., 2019	No	Self-efficacy beliefs
15	Molvinger et al., 2021	No	Passing mention of epistemology.			15	Goeden et al., 2015	No	NoS in background			15	Vincent-Ruz, 2020	No	Competency beliefs
16	Shah et al., 2022	No	Impact of assessment questions			16	Szteinberg et al., 2014	No	Teacher-researcher partnerships			16	Mazzarone & Grove, 2013	Repeat
17	Tothova et al., 2021	No	Passing mention of epistemology.			17	Nardo, 2022	Repeat				17	Santos & Mooring, 2022	Yes
18	Grooms et al., 2021	Maybe	Modeling, includes some metamodeling stuff			18	Carmel et al., 2019	No	NoS in background			18	Atieh & York, 2020	Repeat
19	Abell & Sevian, 2021	No	HS			19	Atieh & York, 2020	Repeat				19	Rodriguez et al., 2020	No	Review
20	Nardo, 2022	No	Grad students			20	Finkenstaedt-Quinn et al., 2019	No	References prior paper			20	Park et al., 2020	Repeat
21	Ryu et al., 2021	No	Review			21	Hosbein et al., 2021	Repeat				21	Harshman, 2021	No	Review
22	An & Holme, 2022	No	NOS with regard to instrumentation.			22	Ngai & Sevian, 2017	No	NoS in background on Chemical Thinking			22	Kim et al., 2020	No	Lit ref
23	Wellhofer & Luhken, 2022	No	Passing mention of epistemology as related to methodology.			23	Sanger, 2008	Yes				23	Herridge & Talanquer, 2021	No	Faculty
24	Noyes et al., 2022	No	Uses conceptual resources, makes passing reference to epistemological resources									24	Macrie-Shuck & Talanquer, 2020	No	Limitations
25	Gurung et al., 2022	Yes										25	Lazenby et al., 2021	Repeat
26	Finne et al., 2022	Yes										26	Hosbein et al., 2021	Repeat
27	Hunter et al., 2022	No	Review									27	Fendos, 2021	No	naming
28	Dood & Watts, 2022	No	Review									28	Schafer & Yezierski, 2021	No	HS
29	Dass et al., 2015	No	HS									29	Zimmermann et al., 2021	Yes	Pre-service teachers
30	Zane & Tucci, 2016	No	HS teachers									30	Belenquer-Sapina et al., 2021	No	HS
31	Heisterkamp & Talanquer, 2015	Yes										31	Naibert et al., 2021	No	Self-efficacy beliefs
32	Franco-Mariscal et al., 2016	No	Games for learning PT. Epistemic research is cited in intro.									32	Shah et al., 2022	Repeat
33	Wheeler et al., 2017	No	Grad students									33	Wang et al., 2021	Maybe	growth mindset stuff
34	Cetin & Eymur, 2017	No	Passing mention of epistemology in citation of prior research									34	Howell et al., 2021	No	Self-efficacy beliefs
35	Popova & Bretz, 2018	Maybe										35	Burrows et al., 2021	Yes
36	Rodriguez et al., 2018	No	Uses conceptual resources, makes passing reference to epistemological resources									36	Connor et al., 2021	No	Self-efficacy beliefs
37	Walker et al., 2019	Yes										37	Van Dusen et al., 2022	No	QuantCrit analysis of ACS scores
38	Crandell et al., 2019	No	Reference to epistemic heuristics paper in background on CMR									38	Abell & Sevian, 2021	Repeat
39	Lazenby et al., 2019	Yes										39	Lee & Orgill, 2022	No	Wording of prompts for ELL students
40	Bain et al., 2019	No	Conceptual resources for mathematical modeling. No epistemic resources discussed, just reference to Lazenby et al.									40	Greaves et al., 2022	No	Self-efficacy beliefs
41	Stieff, 2019	No	Passing mention of epistemology.									41	Werner et al., 2021	No	HS
42	Wheeler et al., 2019	No	Grad students									42	Kelley, 2021	No	Review
43	Rodriguez et al., 2019	No	Uses conceptual resources, makes passing reference to epistemological resources									43	Howe et al., 2022	No	Morgan's paper
44	Noyes & Cooper, 2019	No	Reference to epistemic heuristics paper in background on CMR									44	Ryu et al., 2021	Repeat
45	Bain et al., 2019	No	ChemEd, please use physics and math ed research									45	Shelton et al., 2021	No	Lit ref
46	Xu & Talanquer, 2013	No	Passing mention of epistemology in implications									46	Underwood & Kararo, 2021	No	Faculty
47	Lafarge et al., 2014	No	Curriculum									47	Nagel & Lindsey, 2022	Maybe	Structure of knowledge?
48	MacArthur & Jones, 2013	No	Constructionist epistemology for data analysis									48	Deng et al, 2021	No	Methodology
49	Warfa et al., 2014	No	Epistemology is only discussed in lit background									49	Tashiro & Talanquer, 2021	No	Quant study inequities in gen chem
50	Muniz & Oliver-Hoyo, 2014	No	Passing mention of epistemology as related to methodology.									50	Pulukuri et al., 2021	No	Self-efficacy beliefs
51	Chan & Bauer, 2014	No	Epistemology is only discussed in the implications in terms of future work.									51	Caushi et al., 2021	No	Conceptual
52	DeFever et al., 2015	No	Focused on conceptual understanding of structure-property relationships. Structure of knowledge is referenced but the study does not have an explicit focus on epistemology.									52	Qu & Harshman, 2022	No	Grad student advisor relationships
												53	Naibert & Barbera, 2022	No	Engagement
												54	Guo et al, 2022	No	Affective
												55	Malinakova, 2022	Maybe	Study habits
												56	Hunter et al., 2022	Repeat
												57	Wang & Lewis, 2022	No	Expectancy-value theory
												58	Liu et al., 2022	Yes	Pre-service teachers
												59	Gibbons et al., 2022	No	Assessment survey
												60	Sandlin et al., 2015	No	HS
												61	Cooper et al., 2015	No	Conceptual
												62	Dass et al., 2015	Repeat
												63	Cullipher & Sullivan, 2015	No	Conceptual
												64	Heisterkamp & Talanquer, 2015	Repeat
												65	Tang & Abraham, 2016	No	Visualizations
												66	Galloway et al., 2016	Yes
												67	Neiles et al., 2016	No	Network analysis. Like concept maps
												68	Stanford et al., 2016	No	Discourse during POGIL
												69	Kelly & Akaygun, 2016	No	Visualizations
												70	Velasco et al., 2016	No	Behavior of TAs
												71	Hensiek et al., 2016	No	Lab skills
												72	Becker et al., 2016	No	Conceptual
												73	Ngai & Sevian, 2017	Repeat
												74	Crimmins & Midkiff, 2017	No	Active learning
												75	Gibbons et al., 2017	No	Clicker use
												76	Frey et al., 2017	Maybe	Abstraction vs. Exemplar learners
												77	Flaherty et al., 2017	No	TA training
												78	Talanquer, 2017	Maybe	Switching reasoning modes
												79	Scalco et al., 2017	No	Visualizations
												80	Bain & Towns, 2018	No	Conceptual
												81	Eymur, 2018	No	HS
												82	Fischer et al., 2018	No	HS
												83	Webber & Flynn, 2018	No	Synthesis
												84	Logan & Mountain, 2018	No	HS
												85	Frey et al., 2018	No	Growth mindset intervention is small part but doesn't actually measure student thinking
												86	Enneking et al., 2019	Yes	Some epistemic statements
												87	Walker et al., 2019	Repeat
												88	Alvarez-Chavez et al., 2019	No	Lab safety
												89	Moozeh et al., 2019	Yes	Some epistemic survey items
												90	Wheeler et al., 2019	Repeat
												91	Bancroft et al., 2020	No	Doesn't measure beliefs
												92	Clark et al., 2020	No	Lab activity
												93	Reynders et al., 2019	No	Doesn't measure beliefs
												94	Lazenby et al., 2020	Repeat
												95	Rocabado et al., 2019	No	Attitude
												96	Bain et al., 2019	Repeat
												97	Hensen & Barbera, 2019	No	More attitude
												98	Betancourt-Perez et al., 2020	No	Quant study linking learning objectives to grades
												99	Stott, 2020	No	HS
												100	Murray et al., 2020	No	HS
												101	Hein, 2012	No	Lit ref
												102	Heredia & Lewis, 2012	Yes	CLASS
												103	Herrington et al., 2012	Repeat
												104	Bunce et al., 2011	No	How fast students forget things
												105	Bridle & Yezierski, 2012	No	HS
												106	Sandi-Urena et al., 2012	Maybe	I don't know what IMMEX measures
												107	Boudreaux & Campbell, 2012	No	Content
												108	Williamson et al., 2013	No	eye-tracking
												109	Bauer & Cole, 2012	No	Validity and reliability of POGIL rubric
												110	Grove et al., 2012	No	mechanism use
												111	Harsh et al., 2012	No	self-efficacy beliefs
												112	Sanger et al., 2013	No	Content
												113	Chase et al., 2013	No	Self-efficacy beliefs
												114	Arjoon et al., 2013	No	Methodology
												115	Xu & Talanquer, 2012	No	Doesn't measure beliefs
												116	Bruck & Towns, 2013	No	Faculty
												117	Flores & Smith, 2013	No	HS
												118	Cooper & Klymkowsky, 2013	No	CLUE
												119	Talanquer, 2013	No	Commentary
												120	Young & Talanquer, 2013	Yes
												121	Talanquer, 2013	No	Teleological language
												122	Wren & Barbera, 2013	No	Validity of concept inventory
												123	Warfa et al., 2014	Repeat	Doesn't measure beliefs
												124	Luxford & Bretz, 2014	No	HS
												125	Lewis, 2014	No	Validity of ACS exam
												126	Goeden et al., 2015	Repeat
												127	Pyburn et al., 2014	No	Testing on ELL
												128	Brandriet & Bretz, 2014	No	Concept inventory
												129	Gupta etal., 2015	No	Critical thinking
												130	Kelly, 2014	No	Representations
												131	Szteinberg et al., 2014	Repeat
												132	Bretz & McClary, 2015	No	Reliability
												133	Versprille & Towns, 2015	No	Student understanding of climate change
												134	Galloway & Bretz, 2015	Yes
												135	Xu & Lewis, 2011	No	attitude

## Sheet: CERP - Initial Hits
epistem*						nature of science						belief*
Hit	Article	Include?	If no, why?			Hit	Article	Include?	If no, why?			Hit	Article	Include?	If no, why?
1	Sevian & Coutre, 2018	Yes				1	Demirdogen & Uzuntiryaki-Kondakci, 2016	Repeat				1	Herrington et al., 2011	No	HS
2	Yesiloglu & Koseoglu, 2020	No	HS			2	Eymur, 2019	Repeat				2	Farre & Lorenzo, 2009	Repeat
3	Hunter et al., 2021	Yes				3	Aydin, 2015	repeat				3	Kahveci, 2009	No	HS
4	Keen & Sevian, 2021	Yes				4	Aydin & Tortumlu, 2015	No	HS			4	Markic & Eilks, 2008	Repeat	Pre-service teachers
5	Crujeiras-Perez & Brocos, 2021	Yes	Pre-service teachers			5	Yesiloglu & Koseoglu, 2020	Repeat				5	Wilson-Conrad & Kowalske, 2018	No	Self-efficacy beliefs
6	Vhurumuku, 2011	No	HS			6	Supprakob et al., 2016	Repeat				6	Blonder et al., 2013	No	HS
7	Karch & Sevian, 2022	Yes				7	Bektas et al., 2013	Repeat				7	Vincent-Ruz et al., 2018	Repeat
8	Kelly et al., 2021	Yes				8	Russell & Weaver, 2011	Yes				8	Kotul'akova, 2020	Repeat
9	Sandi-Urena et al., 2011	No	Grad students			9	Ekiz-Kiran & Boz, 2020	No	HS			9	Popova et al., 2021	No	Faculty
10	Stieff et al., 2013	No	HS			10	Walker et al., 2016	Repeat				10	Dunlop et al., 2020	No	Beliefs about fracking
11	Grove & Bretz, 2010	Yes				11	Milanovic & Trivic, 2017	Repeat				11	Popova et al., 2020	No	Faculty
12	Stamovlasis, 2010	No	Methods paper			12	Flaherty, 2020	Repeat				12	Mack & Towns, 2016	Repeat
13	Lazenby & Becker, 2021	Yes				13	Adadan, 2014	No	conceptual			13	Boz et al., 2019	Repeat
14	Poblete et al., 2016	No	Textbooks			14	Kishbaugh et al., 2012	Repeat				14	Grunert & Bodner, 2011	Repeat
15	Flaherty, 2020	Yes				15	Khaddoor et al., 2017	No	HS			15	Ferrell & Barbera, 2015	Repeat	Self-efficacy beliefs and effort beliefs
16	Ryu et al., 2018	Yes	Pre-service teachers			16	Calik & Cobern, 2017	Yes				16	Demirdogen & Uzuntiryaki-Kondakci, 2016	Repeat
17	do Amaral et al., 2018	No	HS			17	Can & Boz, 2022	Yes				17	Mataka & Kowalske, 2015	No	Self-efficacy beliefs
18	Joki & Aksela, 2018	No	HS			18	Akin & Uzuntiryaki-Kondakci, 2018	No	HS
19	Mack & Towns, 2016	No	Faculty			19	Aydin-Gunbatar & Akin, 2022	Maybe
20	Lemma & Belachew, 2022	No	Faculty			20	Aydin et al., 2014	No	HS
21	Coll & Taylor, 2001	No	Review			21	Ozkanbas & Kirik, 2020	Repeat
22	Berg, 2005	Yes				22	Kotul'akova, 2020	Repeat
23	Bhattacharyya, 2008	No	Grad students			23	Uzuntiryaki-Kondakci et al., 2017	No	HS
24	Yaman, 2021	Yes	Pre-service teachers			24	Verdan et al., 2010	Repeat
25	Pabuccu & Erduran, 2016	No	K-12			25	Ruschenpohler & Markic, 2020	No	HS
26	Markic & Eilks, 2008	Yes	Pre-service teachers			26	Zheng et al., 2019	No	HS
27	Demirdogen & Uzuntiryaki-Kondakci, 2016	Yes	Pre-service teachers			27	Can-Kucuk et al., 2022	Yes
28	Yaman & Hand, 2022	No	Coded for structural aspects of argument to identify "quality" on a scale of 1-15 which was then correlated to use of representations. No further discussion of quality.			28	Ekiz-Kiran et al., 2021	Yes	PCK
29	Teo et al., 2014	No	Review			29	Wei & Liu, 2018	Repeat
30	Flaherty et al., 2017	No	Just in lit background			30	Vesterinen & Aksela, 2009	Yes	Pre-service teachers
31	Lewthwaite et al., 2014	No	HS			31	Scerri, 2001	No	review/commentary
32	Becker et al., 2013	Yes				32	Raker & Towns, 2012	No	How to design synthesis problems for Ochem
33	Jones et al., 2022	No	Faculty			33	Mack & Towns, 2016	Repeat	Faculty
34	Becker & Towns, 2012	No	Citing Tuminaro paper on epistemic games			34	Belova & Eilks, 2015	No	MS
35	da Silva Costa & dos Santos, 2022	Maybe				35	Criswell, 2012	Repeat
36	Verdan et al., 2010	No	Grad students			36	Niaz & Rodriguez, 2001	No	Review
37	Moon et al., 2019	Maybe				37	Boddey & de Berg, 2015	Maybe	Nursing students
38	Petritis et al., 2022	Maybe				38	Christensson & Sjostrom, 2014	No	Swedish Chemical Society's videos for HS students
39	Berg et al., 2019	Yes	Pre-service teachers			39	Warfa et al., 2014	No	representations
40	Sanchez Gomez & Martin, 2003	No	History of quantum chemistry curriculum			40	Gencer & Akkus, 2021	No	HS
41	Deng et al., 2019	Maybe				41	Farre & Lorenzo, 2009	No	Faculty
42	Thomas, 2017	No	HS			42	Quilez, 2004	Repeat
43	Akkuzu & Uyulgan, 2016	No	"Epistemological" (and related words) only in title. Actually conceptual understanding			43	Niaz & Rodriguez, 2000	Repeat
44	Deng & Wang, 2017	No	K-12			44	Penn & Ramnarain, 2019	No	virtual simulations
45	Robertson & Schaffer, 2014	No	Epistemology in limitations and implications			45	Orosz et al., 2022	Repeat
46	Quilez, 2004	No	History of chemical equilibrium			46	Pabuccu & Erduran, 2016	Repeat
47	Watts et al., 2022	No	References and implications and background			47	Gegios et al., 2017	No	HS
48	Juntunen & Aksela, 2014	No	HS			48	Lewthwaite, 2014	No	HS
49	Stamovlasis et al., 2013	No	Theory vs. Conceptual resources			49	Kempa, 2002	No	Commentary
50	Walker et al., 2016	Maybe	Passing reference			50	Tosun, 2019	No	MS
51	Muniz & Oliver-Hoyo, 2014	No	Epistemology in methodology			51	Coll & Taylor, 2001	Repeat
52	Ozkanbas & Kirik, 2020	No	MS			52	He et al., 2021	No	HS
53	Bowen et al., 2022	Yes				53	Sanchez Gomez & Martin, 2003	Repeat
54	Goodwin, 2002	No	Personal reflection			54	Raker & Towns, 2012	No	Organic chemists
55	Berg & Moon, 2022	Maybe				55	Upahi & Ramnarain, 2019	No	HS
56	Dunlop et al., 2020	No	Philosophical dialogue groups for chemistry to support well being			56	Crujeiras-Perez & Brocos, 2021	Repeat
57	Kotul'akova, 2020	Yes	Pre-service teachers			57	Hosbein & Barbera, 2020	Repeat
58	Hosbein & Barbera, 2020	Maybe	Identity. But one of the codes is "science or chemistry as an epistemology"			58	Sendur et al., 2017	Yes	Pre-service teachers
59	Crujeiras-Perez & Jimenez-Aleixandre, 2017	No	HS			59	Levy Nahum et al., 2004	No	Lit ref
60	Hernandez et al., 2014	No	Epistemology only in implications			60	Cigdemoglu et al., 2017	Yes	Pre-service teachers but enrolled in Gen Chem II
61	Criswell, 2012	No	HS			61	Stavrou et al., 2018	Repeat
62	Dohrn & Dohn, 2018	No	HS			62	Bergqvist et al., 2013	Repeat	HS
63	Szalay et al., 2020	No	MS			63	Haglund et al., 2015	Repeat
64	Taylor & Coll, 2002	Yes	Pre-service teachers			64	Mandler et al., 2012	No	HS
65	Tsaparlis, 2001	No	History of Schrodinger's equation			65	Boz et al., 2019	Yes	Pre-service teachers
66	Martin del Pozo & Porlan, 2001	Yes	Pre-service teachers			66	Al-Amoush et al., 2012	No	HS
67	Becker et al., 2015	No	Reference to literature			67	Alvarado et al., 2015	No	HS
68	Rodriguez et al., 2019	No	Passing reference			68	Cigdemoglu & Geban, 2015	No	HS
69	Orosz et al., 2022	No	HS			69	Breslyn, 2020	No	Internet questions
70	Bhattacharyya, 2014	No	Implications			70	Karatas, 2016	Yes	Pre-service teachers
71	Heeg et al., 2020	No	HS			71	Cink & Song, 2016	Maybe
72	Emden et al., 2018	No	HS			72	Miller-Friedmann et al., 2018	No	Practicing chemists
73	Oyehaug & Holt, 2013	No	MS			73	Boesdorfer & Livermore, 2018	Repeat	HS
74	Keiner & Graulich, 2020	No	Reference to literature			74	Domin, 2008	Yes
75	Rodriguez et al., 2020	No	Reference to literature			75	Villafane & Lewis, 2016	No	Lit ref
76	Akinyemi & Mavhunga, 2021	No	Content focus of PCK			76	Shwartz et al., 2006	No	HS
77	Li et al., 2013	Maybe				77	Zowada et al., 2020	No	HS
78	Chopra et al., 2017	Yes				78	Deng et al., 2019	Repeat
79	Ho et al., 2021	No	Constructivist epistemology			79	Szteinberg & Weaver, 2013	Maybe
80	Rodriguez & Towns, 2019	No	Resources theoretical framework, names epistemological resources but focuses on conceptual			80	Yakmaci-Guzel, 2013	No	HS
81	Moon et al., 2016	No	Description of study of epistemic levels in lit background			81	Burrows et al., 2017	Repeat
82	Wheeler et al., 2015	No	"constructivist epistemology" underlying situated learning theory			82	Degerman & Tibell, 2012	No	Cell metabolism
83	Szalay & Toth, 2016	No	HS			83	Moon et al., 2018	No	Lit ref
84	Derman & Eilks, 2016	No	HS			84	Ferrell & Barbera, 2015	No	NoS excluded
85	Nakiboglu & Nakiboglu, 2019	Yes	Pre-service teachers			85	Schultz et al., 2018	Repeat
86	Canelas et al., 2017	No	Epistemology only in implications			86	Martin del Pozo & Porlan, 2001	Repeat
87	Stavrou et al., 2018	No	HS			87	Salonen et al., 2018	No	HS
88	Warfa & Odowa, 2015	No	Passing reference			88	Figueiredo et al., 2016	No	Lit ref
89	Grunert & Bodner, 2011	No	Feminist epistemology. Focus on self-efficacy beliefs and their impact on career choices.			89	Putica & Trivic, 2016	No	HS
90	Ralph et al., 2022	No	Passing reference			90	Zemel et al., 2021	Repeat
91	Supprakob et al., 2016	No	HS			91	Hofstein, 2004	No	Review
92	Rodriguez et al., 2019	No	Reference to epistemological resources			92	Teo et al., 2014	Repeat
93	Galloway & Bretz, 2016	No	Passing reference			93	Regan & Childs, 2003	No	HS
94	Bergqvist et al., 2013	No	HS			94	Szalay & Toth, 2016	Repeat
95	Popova & Jones, 2021	No	Passing reference			95	Smith & Alonso, 2020	Repeat
96	Heidbrink & Weinrich, 2021	No	Faculty			96	Kelly et al., 2017	No	Implications only
97	Putra & Tang, 2016	No	HS			97	Zoller & Pushkin, 2007	No	No data
98	Aydin, 2015	No	Faculty			98	Vojir & Rusek, 2022	No	HS
99	Milanovic & Trivic, 2017	No	HS			99	Turan-Oluk & Ekmekci, 2018	No	Intro
100	Rodriguez & Towns, 2021	No	Misconsceptions vs. conceptual resources			100	Akkuzu & Uyulgan, 2017	Maybe
101	Smith & Alonso, 2020	No	Engagement in lab			101	Toomey & Garafalo, 2003	No	Implications only
102	Eichler et al., 2004	No	HS			102	Sandi-Urena et al., 2011	Repeat
103	Taber, 2001	No	Review			103	Tal et al., 2021	Yes	Pre-service teachers
104	Laugier & Dumon, 2003	No	In French			104	Current & Kowalske, 2016	No	TA talk moves
105	Bhattacharyya, 2006	No	References only			105	Josephsen, 2003	Repeat
106	Cokelez & Dumon, 2005	No	HS			106	Chase et al., 2017	Maybe
107	Kennepohl, 2007	No	Passing reference			107	Flynn, 2014	No	Lit ref
108	Nakiboglu, 2003	Yes	Pre-service teachers			108	Grunert & Bodner, 2011	Repeat
109	Taber, 2003	No	Intro to themed collection			109	Keiner et al., 2020	Yes	Pre-service teachers
110	Taber & Watts, 2000	Yes				110	Cavalli et al., 2015	No	Lit ref
111	Quilez, 2004	No	Passing reference			111	Schallies & Eysel, 2004	Repeat
112	Laugier & Dumon, 2004	No	HS			112	Martinez et al., 2021	No	Intro
113	Laugier & Dumon, 2004	No	French version of previous article			113	Witteck et al., 2007	No	HS
114	Taber, 2001	No	Partnership between researchers and practitioners			114	Danili & Reid, 2006	No	HS
115	Tzougraki et al., 2000	No	Describes Greek grad program that includes history and epistemology of chemistry
116	Solaz & Quilez, 2001	No	Offers "a relevant advanced thermodynamic discussion" for Le Chatelier's Principle
117	Ouasri, 2017	No	Passing reference
118	Graulich et al., 2012	No	Teaching a heuristic for pericyclic rxns
119	Howard et al., 2013	No	Naïve conceptions for atmospheric chemistry
120	Ho et al., 2021	Maybe
121	Wei et al., 2018	No	Constructivist epistemology
122	Kishbaugh et al., 2012	Yes	Rubric for assessing nature of science across science courses
123	Moreira et al., 2019	No	HS
124	Szalay et al., 2021	No	MS
125	Barria et al., 2016	No	Examines how osmosis is presented in textbooks
126	Luo et al., 2020	No	HS
127	Sendur, 2014	Yes	Pre-service teachers
128	Pekdag & Azizoglu, 2013	No	How textbooks discuss amount of substance
129	Christian & Yezierski, 2012	No	MS
130	Bektas et al., 2013	Yes	Pre-service teachers
131	Supalo et al., 2016	No	HS
132	Grove & Bretz, 2012	Yes
133	Vincent-Ruz et al., 2018	No	Competency beliefs
134	Al-Balushi & Al-Hajri, 2014	No	Visualizations in Ochem
135	Mavhunga, 2016	Yes	Pre-service teachers
136	Becker et al., 2017	No	Resources theoretical framework, names epistemological resources but focuses on conceptual
137	Hennah, 2019	No	HS
138	Hansen et al., 2019	No	Eye tracking
139	Haglund et al., 2015	No	Lit ref
140	de Oliveira et al., 2021	No	Passing reference
141	Lawrie et al., 2019	No	Faculty
142	Wang & Barrow, 2013	No	Future research
143	Moore et al., 2013	No	Future research
144	Schultz et al., 2018	No	Faculty
145	Watts et al., 2021	No	Passing reference
146	Wei & Liu, 2018	No	HS
147	Popova & Bretz, 2018	No	Passing reference
148	Sandi-Urena et al., 2011	Yes
149	Towns et al., 2012	No	Representations
150	Zemel et al., 2021	Yes	Pre-service teachers
151	Eymur, 2019	No	HS
152	Sasson & Dori, 2015	No	MS & HS
153	Petritis et al., 2021	Yes
154	Burrows et al., 2017	Yes
155	Wood et al., 2013	No	HS
156	Boesdorfer & Livermore, 2018	No	HS
157	Bodner, 2007	No	Reflection
158	Seddigi & Overton, 2003	No	Reference
159	Niaz & Rodriguez, 2000	No	Study on textbooks
160	Gauchon & Meheut, 2007	No	HS
161	Taber, 2003	No	Memory of chemistry from a former student
162	Eskilsson & Hellden, 2003	No	MS
163	Tan et al., 2005	No	HS
164	Kampourakis & Tsaparlis, 2003	No	HS
165	Schallies & Eysel, 2004	No	HS
166	Buntine et al., 2007	No	Reference
167	Furio et al., 2002	No	Review
168	Chittleborough & Treagust, 2007	No	Passing reference
169	Gilbert et al., 2004	No	State of chem ed research
170	Josephsen, 2003	No	Reference

## Sheet: JRST - Initial Hits
epistem*						nature of science						belief*
Hit	Article	Include?	If no, why?			Hit	Article	Include?	If no, why?			Hit	Article	Include?	If no, why?
1	Havdala & Ashkenazi, 2007	Yes				1	McDonald, 2010	Repeat				1	Gibbons et al., 2018	Repeat
2	McDonald, 2010	Yes	Pre-service teachers			2	Abd-El-Khalick et al., 2008	Repeat				2	Roehrig et al., 2007	Repeat
3	Grooms et al., 2018	No	HS			3	Havdala & Ashkenazi, 2007	Repeat				3	McDonald, 2010	Repeat
4	Roehrig et al., 2007	No	HS			4	She & Liao, 2009	Repeat				4	McClary & Talanquer, 2011	No	Mental models of acids and bases
5	Abd-El-Khalick et al., 2008	No	HS			5	Sinapuelas & Stacy, 2015	Repeat				5	Becker & Cooper, 2014	No	Potential energy and bonding
6	Sinapuelas & Stacy, 2015	Maybe	Metacognition			6	Krystyniak & Heikkinen, 2007	No	Discourse analysis, NoS in future research			6	Nieswandt, 2006	No	HS
7	Hu et al., 2022	No	Meta-analysis			7	Lewis et al., 2021	Repeat				7	Krystyniak & Heikkinen, 2007	Repeat
8	She & Liao, 2009	No	MS			8	McNeill & Krajck, 2007	No	MS			8	Stains & Talanquer, 2007	No	Explicit vs. implicit features of representations
9	Winberg & Berg, 2007	Maybe				9	Gibbons et al., 2018	Repeat				9	Maeyer & Talanquer, 2013	No	Heuristics
10	Walker & Sampson, 2013	Yes				10	DeKorver & Towns, 2016	Repeat				10	Park & Oliver, 2008	No	HS
11	Gibbons et al., 2018	No	Faculty			11	Matz et al., 2012	No	Quant study on relationship between lab and lecture enrollment			11	Kulatunga et al., 2013	Maybe	Scientific argumentation
12	Lewis et al., 2021	No	HS			12	van Rens et al., 2010	No	HS			12	McNeill & Krajck, 2007	Repeat
13	Lazenby et al., 2019	Yes				13	Moon et al., 2017	Repeat				13	Abd-El-Khalick et al., 2008	Repeat
14	Bhattacharyya & Bodner, 2014	No	Grad students			14	Mendonca & Justi, 2013	Repeat				14	Havdala & Ashkenazi, 2007	Repeat
15	Hoft et al., 2018	No	HS									15	Sinapuelas & Stacy, 2015	Repeat
16	Lopez et al., 2013	No	Study strategies									16	Stieff, 2011	No	HS
17	Ralph et al., 2022	No										17	Erman, 2016	No	Identifying misconceptions
18	Overman et al., 2018	No	HS									18	Hu et al., 2022	Repeat
19	Gunnarsson et al., 2017	No	HS									19	She & Liao, 2009	Repeat
20	Moon et al., 2017	No	Reasoning complexity									20	Winberg & Berg, 2007	Repeat
21	Mendonca & Justi, 2013	No	HS									21	Walker & Sampson, 2013	Repeat
22	DeKorver & Towns, 2016	Yes										22	Frailich et al., 2008	No	HS
												23	Lewis & Lewis, 2008	No	Ref
												24	Cartrette & Bodner, 2010	No	Solving NMR
												25	Johnson & Tymms, 2011	No	MS
												26	Huang, 2021	Maybe	More attitude?
												27	Taasoobshirazi & Glynn, 2009	No	Self-efficacy
												28	Plass et al., 2012	No	HS
												29	Chan & Bauer, 2015	No	Self-concept
												30	Steegh et al., 2020	No	HS
												31	Hoft et al., 2018	Repeat
												32	Lopez et al., 2014	Maybe	Concept maps to probe knowledge structure
												33	Overman et al., 2018	Repeat
												34	Mendonca & Justi, 2013	Repeat
												35	Raker et al., 2018	Maybe	Not sure what control beliefs are
												36	Lopez et al., 2013	Repeat
												37	Ralph et al., 2022	Repeat
												38	DeKorver & Towns, 2016	Repeat
												39	Moon et al., 2017	Repeat
												40	van Rens et al., 2010	Repeat
												41	Gunnarsson et al., 2017	Repeat
												42	Moon et al., 2017	Repeat
												43	Bhattacharyya & Bodner, 2014	Repeat
												44	Lazenby et al., 2019	Repeat
												45	Zohar & Levy, 2021	No	HS
												46	Zohar & Levy, 2019	No	HS

## Sheet: Sci Ed - Initial Hits
epistem*						nature of science						belief*
Hit	Article	Include?	If no, why?			Hit	Article	Include?	If no, why?			Hit	Article	Include?	If no, why?
Patron et al., 2017	No	HS				Morales-Doyle et al., 2019	No	NGSS critique				Patron et al., 2017	Repeat
Patron et al., 2021	No	HS										Morales-Doyle et al., 2019	Repeat
Morales-Doyle, 2017	No	HS										Morales-Doyle, 2017	Repeat
												Patron et al., 2021	Repeat
												Casselman et al., 2021	No	Physical vs. virtual representations

## Sheet: Int J Sci Ed - Initial Hits
epistem*						nature of science						belief*
Hit	Article	Include?	If no, why?			Hit	Article	Include?	If no, why?			Hit	Article	Include?	If no, why?
1	Baltieri et al., 2021	Yes				1	DiGuiseppe, 2014	Repeat				1	Freire et al., 2019	Repeat
2	Freire et al., 2019	No	Theory			2	van Rens et al., 2016	No	HS			2	Reigosa & Jimenez-Aleixandre, 2007	Repeat
3	da Silva & dos Santos, 2021	No	HS			3	Freire et al., 2019	Repeat				3	Akaygun & Jones, 2014	No	Info conveyed in representations
4	Prins et al., 2011	No	HS			4	Overman et al., 2013	Repeat				4	George-Williams et al., 2020	No	Perceptions of lab, no epistemic components
5	Reigosa & Jimenez-Aleixandre, 2007	No	HS			5	Bergqvist et al., 2016	No	HS			5	Chiu, 2007	Repeat
6	Chiu, 2007	No	HS			6	van Rens et al., 2014	No	HS			6	Ramly et al., 2022	No	HS
7	Hoft & Bernholt, 2019	No	HS			7	Jegstad & Sinnes, 2015	Repeat				7	Hoft & Bernholt, 2019	Repeat
8	Jaber & BouJaoude, 2011	No	HS			8	Klosterman & Sadler, 2010	No	HS			8	Schmid et al., 2012	No	Grades, self-efficacy
9	Pabuccu & Erduran, 2017	Yes	Pre-service teachers			9	Salta & Koulougliotis, 2020	Repeat				9	McClary & Bretz, 2012	Repeat
10	McClary & Bretz, 2012	No	Concept inventory			10	Boesdorfer & Lorsbach, 2014	Repeat				10	Taskin & Bernholt, 2014	No	Review
11	Kaufman et al., 2017	Yes	Practical Epistemology Analysis			11	Halilikari & Nevgi, 2010	No	Only measures content knowledge			11	Pabuccu & Erduran, 2017	Repeat
12	Manneh et al., 2018	Yes	Practical Epistemology Analysis			12	Fisher et al., 2020	No	Gender, science identity, and belonging			12	McClary & Talanquer, 2011	No	Heuristics for acid-base chemistry
13	Hamza & Wickman, 2013	No	HS			13	Dori et al., 2018	No	HS			13	Schultze & Nilsson, 2018	No	HS
14	Kermen & Meheut, 2011	No	HS			14	Wei & Chen, 2020	Repeat				14	Ruschenpohler & Markic, 2020	No	HS
15	Cetin et al., 2018	No	HS			15	Vos et al., 2011	No	HS			15	DiGuiseppe, 2014	Repeat
16	Jegstad & Sinnes, 2015	No	Theory			16	Strippel & Sommer, 2015	Repeat				16	Fisher et al., 2020	Repeat
17	Kind, 2014	Yes	Pre-service teachers			17	Yoon et al., 2014	Yes	Pre-service teachers			17	Kermen & Meheut, 2011	Repeat
18	DiGuiseppe, 2014	No	HS									18	Jegstad & Sinnes, 2015	Repeat
19	Wei, 2013	No	Bio of a Chinese chemistry educator									19	Delaney et al., 2021	Maybe	Systems Thinking. Not available on SciHub.
20	Christian & Talanquer, 2012	Yes										20	Wheeldon, 2017	Yes	Pre-service teachers
21	Wei & Long, 2021	No	HS									21	da Silva & dos Santos, 2021	Repeat
22	de Fatima Cardoso Gomes et al., 2011	No	HS									22	Cetin et al., 2018	Repeat
23	Overman et al., 2013	No	HS									23	Stolk et al., 2012	No	HS
24	Samspon & Walker, 2012	Maybe	I've kept most the other ADI stuff									24	Gong & Bergey, 2020	No	HS
25	Tseng et al., 2010	No	MS									25	Hilton & Nichols, 2011	No	HS
26	Wei & Chen, 2020	No										26	Christian & Talanquer, 2012	Repeat
27	Schultz et al., 2017	No	Content									27	Yan & Talanquer, 2015	No	Conceptual
28	Salta & Koulougliotis, 2020	No	Motivation									28	Cousins, 2007	No	HS
29	McDowell, 2019	No	Review									29	Ngai et al., 2014	No	Theory
30	Taber & Tan, 2011	No	HS									30	Wei & Long, 2021	Repeat
31	Balabanoff et al., 2020	No	Conceptual levels									31	Balabanoff et al., 2022	No	Understanding of light
32	Boesdorfer & Lorsbach, 2014	No	HS									32	Waight et al., 2014	No	HS
33	Strippel & Sommer, 2015	No	HS									33	Halilikari & Nevgi, 2010	Repeat
34	Kind & Kind, 2011	Yes	Pre-service teachers									34	Overman et al., 2013	Repeat
35	Danckwardt-Lilliestrom et al., 2020	No	HS									35	Talanquer, 2010	Yes	Nature of explanations
36	del Mar Aragon et al., 2014	No	HS									36	Vos et al., 2011	Repeat
												37	Tseng et al., 2010	No	MS
												38	Wei, 2012	Repeat
												39	Langbeheim & Levy, 2018	No	MS
												40	Dori et al., 2018	Repeat
												41	Kaufman et al., 2017	Repeat
												42	Klosterman & Sadler, 2010	Repeat
												43	Ropohl & Ronnebeck, 2019	Yes	Pre-service teachers
												44	Smithenry, 2010	No	HS
												45	Overman et al., 2014	No	HS
												46	Wei & Chen, 2020	Repeat
												47	Zhang & Linn, 2013	No	Representations
												48	de Fatima Cardoso Gomes et al., 2011	Repeat
												49	Manneh et al., 2018	Repeat
												50	van Rens, 2013	Repeat
												51	Davila-Acedo et al., 2021	No	HS
												52	Samspon & Walker, 2012	Repeat
												53	Mathabathe & Potgieter, 2017	Maybe	Metacognition
												54	Stammes et al., 2020	No	HS
												55	Ong et al., 2022	No	HS
												56	Broman et al., 2018	No	HS
												57	McDowell, 2019	No	Review
												58	Salta & Koulougliotis, 2020	Repeat
												59	Sandi-Urena et al., 2011	Maybe	Metacognition
												60	Taber & Tan, 2011	Repeat
												61	Boesdorfer & Lorsbach, 2014	Repeat
												62	Gulacar & Fynewever, 2010	No	Rating difficulty of stoich problems
												63	Strippel & Sommer, 2015	Repeat
												64	Talanquer, 2009	Maybe	Structure of matter
												65	Prins et al., 2011	Repeat
												66	Vilia & Candeias, 2020	No	HS
												67	Adadan & Savasci, 2012	No	HS
												68	Balabanoff et al., 2020	Repeat
												69	Ding & Harskamp, 2011	No	HS
												70	Kind & Kind, 2011	Repeat
												71	Sakhnini & Blonder, 2016	No	HS
												72	Kukkonen et al., 2014	No	Elem
												73	Cheng & Gilbert	No	HS
												74	Vyas et al., 2021	No	Predicting at-risk students
												75	Mozzer & Justi, 2012	No	MS
												76	Papageorgiou et al., 2010	No	MS
												77	del Mar Aragon et al., 2014	Repeat

## Sheet: Taylor & Francis - Initial Hits
epistem*							nature of science						belief*
Hit	Article	Journal	Include?	If no, why?			Hit	Article	Include?	If no, why?			Hit	Article	Journal	Include?	If no, why?
1	Baltieri et al., 2021		Repeat				1	DiGuiseppe, 2014	Repeat				1	Markic et al., 2016	Teachers and Teaching	Repeat
2	Freire et al., 2019		Repeat				2	Milanovic & Trivic, 2022	No	HS			2	van Driel et al., 2008	Journal of Curriculum Studies	No	HS
3	da Silva & dos Santos, 2021		Repeat				3	Aglarci et al., 2016	Yes	Pre-service teachers			3	Al-Amoush et al., 2013	European Journal of Teacher Education	Repeat
4	Cetin-Dindar et al., 2014	European Journal of Teacher Education	Yes				4	van Rens et al., 2016	No	HS			4	Cetin-Dindar et al., 2014	European Journal of Teacher Education	Repeat
5	Prins et al., 2011		Repeat				5	Milanovic et al., 2021	No	HS			5	Boz et al., 2016	Research in Science & Technological Education	No	Self-efficacy belefs
6	Reigosa & Jimenez-Aleixandre, 2007		Repeat				6	Freire et al., 2019	Repeat
7	Chiu, 2007		Repeat				7	Karpin et al., 2014	No	HS
8	Luvanga & Mkimbili, 2020	J Res Math, Sci, Tech Educ	No	HS			8	Aydeniz & Kirbulut, 2014	Repeat
9	Aydeniz & Kirbulut, 2014	Pre-service teachers	Yes				9	Van Duzor, 2012	No	MS
10	Hoft & Bernholt, 2019		Repeat				10	Chairam et al., 2009	No	Conceptual
11	Jaber & BouJaoude, 2011		Repeat				11	Overman et al., 2013	Repeat
12	Markic et al., 2016	Teachers and Teaching	No	HS			12	Keinonen & de Jager, 2017	Yes	Pre-service teachers
13	Milanovic et al., 2021	Research in Science & Technological Education	No	HS			13	Bergqvist et al., 2016	No	HS
14	Pabuccu & Erduran, 2017		Repeat				14	van Rens et al., 2014	No	HS
15	McClary & Bretz, 2012		Repeat				15	Madden et al., 2016	Yes	Pre-service teachers
16	Kaufman et al., 2017		Repeat				16	Jegstad & Sinnes, 2015	Repeat
17	Manneh et al., 2018		Repeat				17	Klosterman & Sadler, 2010	No	HS
18	Al-Amoush et al., 2013	European Journal of Teacher Education	Yes				18	Salta & Koulougliotis, 2020	Repeat
19	Hamza & Wickman, 2013		Repeat				19	King, 2012	No	Review
20	Kermen & Meheut, 2011		Repeat				20	Papadimitriopoulos & Pavlatou, 2021	No	MS
21	Cetin et al., 2018		Repeat				21	Akbayrak & Namdar, 2019	No	Elem
22	Jegstad & Sinnes, 2015		Repeat				22	Boesdorfer & Lorsbach, 2014	Repeat
23	Kind, 2014		Repeat				23	Cancela et al., 2016	No	activity
24	DiGuiseppe, 2014		Repeat				24	Halilikari & Nevgi, 2010	No	Only measures content knowledge
25	Wei, 2013		Repeat				25	Fisher et al., 2020	No	Gender, science identity, and belonging
26	Christian & Talanquer, 2012		Repeat				26	Atabek-Yigit & Senoz, 2021	No	Procedural mistakes in lab
27	Yan & Talanquer, 2015	Int J Sci Ed	No	Conceptual			27	Al-Amoush et al., 2013	Repeat	Pre-service teachers
28	Wei & Long, 2021		Repeat				28	Marteel-Parrish & Harvey, 2019	No	Chemistry + Art
29	de Fatima Cardoso Gomes et al., 2011		Repeat				29	Cascarosa-Salillas et al., 2021	No	HS
30	Sibanda & Hobden, 2016	African Journal of Mathematics, Science, & Technology Education	No	HS			30	Dori et al., 2018	No	HS
31	Overman et al., 2013		Repeat				31	Wei & Chen, 2020	Repeat
32	Samspon & Walker, 2012		Repeat				32	Vos et al., 2011	No	HS
33	Tseng et al., 2010		Repeat				33	van Dulmen et al., 2022	No	HS
34	Gibbons et al., 2018	Educational Psychology	No	Relationship between enjoyment, anxiety, and achievement			34	Yalcin-Celik et al., 2017	Yes	Pre-service teachers
35	Arslan et al., 2018	Reflective Practice	No	HS			35	Strippel & Sommer, 2015	Repeat
36	Wei & Chen, 2020		Repeat				36	Peterson et al., 2019	No	Need statisticians in manufacturing. No idea what it's doing in this journal
37	Koopman, 2017	African Journal of Mathematics, Science, & Technology Education	No	HS			37	Yoon et al., 2014	Repeat	Pre-service teachers
38	Schultz et al., 2017		Repeat				38	Eymur & Capps, 2022	No	HS
39	McDowell, 2019		Repeat				39	Afonso & Gilbert, 2013	No	Pop science books
40	Salta & Koulougliotis, 2020		Repeat				40	Nahum et al., 2010	No	Review
41	Taber & Tan, 2011		Repeat
42	Quilez, 2019	Studies in Science Education	No	Vocab difficulties
43	Rahmawati & Taylor, 2015	Reflective Practice	No	Personal story
44	Balabanoff et al., 2020		Repeat
45	Boesdorfer & Lorsbach, 2014		Repeat
46	Milanovic & Trivic, 2022	Journal of Education for Teaching	No	HS
47	Strippel & Sommer, 2015		Repeat
48	Khourey-Bowers & Fenk, 2009	Journal of Science Teacher Education	No	HS
49	Kind & Kind, 2011		Repeat
50	Gunga & Ricketts, 2008	Educational Philosopy & Theory	No	Theory
51	Nahum et al., 2010	Studies in Science Education	No	Review
52	Danckwardt-Lilliestrom et al., 2020		Repeat
53	Heikkinen et al., 2017	European Journal of Engineering Education	No	Doesn't measure epistemology
54	Villalta-Cerdas et al., 2015	Assessment and Evaluation in Higher Education	No	RateMyProfessor use
55	Makhechane & Mavhunga, 2021	African Journal of Mathematics, Science, & Technology Education	No	topic specific PCK.
56	Linder & Fraser, 2009	Education as Change	No	Activity
57	del Mar Aragon et al., 2014		Repeat

## Sheet: ERIC - Initial Hits
epistem*						nature of science							belief*
Hit	Article	Journal	Include?	If no, why?		Hit	Article	Journal	Include?	If no, why?			Hit	Article	Include?	If no, why?
1	Tumay, 2016	Science & Education	No	Understanding of acid/base chemistry		1	Celik, 2020	Int. J. Res. Educ. Sci.	Yes
2	Yesiloglu et al., 2020	CERP	Repeat			2	Venessa et al., 2019	J. Sci. Learn.	Yes
3	Rodriguez et al., 2020	Int J Res Undergrad Math Educ	Yes			3	Agustian, 2020, E. J. Res. Sci. Math. Educ.		Yes
4	Clark et al, 2016	JCE	No	Lab design		4	Jimenez-Liso et al., 2020	Science & Education	No	Course design
5	Tumay, 2016	CERP	Maybe	Argues for interpreting student difficulties from an emergence perspective		5	Yesiloglu et al., 2020	CERP	Repeat
6	Karch & Sevian, 2022	CERP	Repeat			6	Eilks et al., 2022	JCE	Yes
7	Veal, 2004	Int J Sci Ed	Yes			7	Demirdogen et al., 2016	Res. Sci. Educ.	Yes
8	Manneh et al., 2018	Asia-Pacific Form	No	Can't get a pdf		8	An & Holme, 2022	JCE	Repeat
9	Sojat, 2020	Center for Educational Policty Studies Journal	Yes			9	Pagano et al., 2018	JCE	Yes
10	Lazenby et al., 2020	JCE	Repeat			10	Schultz & Gere, 2015	JCE	Yes
11	Manneh et al., 2018	Int J Sci Ed	Repeat			11	Aglarci et al., 2016	Cogent Education	Repeat
12	Poblete et al., 2016	CERP	Repeat			12	Ayoubi et al., 2017	J. Educ. Sci. Environ. Health	No	In-service teachers
13	Baltieri et al., 2021	Int J Sci Ed	Repeat			13	Ward & Haigh, 2017	Res in Sci Educ	Yes
14	Victor et al., 2021	Int J Res Educ Sci	No	HS		14	Gardner, 2017	Int. J. Environmental and Sci. Educ.	Yes
15	Kelly et al., 2021	CERP	Repeat			15	Aydin, 2015	CERP	Repeat
16	Hunter et al., 2021	JCE	Repeat			16	Vesterinen et al., 2013	Science & Education	Yes
17	Crujeiras-Perez & Brocos, 2021	CERP	Repeat			17	Garcia-Carmona et al., 2017	Science & Education	Yes
18	Bancroft, 2013	Multicultural Education	No	Grad students		18	Goff et al., 2012	Cultural Studies of Science Education	Yes
19	Chiang, 2011	European Journal of Education	No	Grad students		19	Bektas et al., 2013	CERP	Repeat
20	Graulich, 2015	CERP	No	Review		20	Flener-Levitt, 2014	JCE	No	Course design
21	Lee et al., 2022	British Journal of Educational Technology	Yes			21	Amaris et al., 2017	JCE	No	Lab design
22	Deng et al., 2017	Australasian Journal of Educational Technoloy	Yes			22	Slominski et al., 2020	CBE – Life Sciences Education	No	Faculty
23	Souza & Porto, 2012	JCE	No	Activity		23	Justi et al., 2016	Science & Education	No	Activity
24	Al-Amoush et al., 2014	Int J Sci Math Educ	Yes			24	Sumter & Owens, 2011	Biochemistry and Molecular Biology Education	No	Course design
25	Mazzarone & Grove, 2013	JCE	Repeat			25	Demirdogen & Uzuntiryaki-Kondakci, 2016	CERP	Repeat
26	Cetin-Dindar et al., 2014	European Journal of Teacher Education	Repeat			26	Karakas, 2011	Qualitative Report	No	Faculty
27	Kaufman et al., 2017	Int J Sci Ed	Repeat			27	Marchlewicz & Wink, 2011	JCE	Yes
28	Topcu, 2013	Int J Sci Math Educ	Yes			28	Clark & Chamberlain, 2014	JCE	No	Activity
29	Becker et al., 2013	CERP	Repeat			29	Niaz, 2009	Science & Education	No	HS
30	Al-Amoush et al., 2013	European Journal of Teacher Education	Repeat			30	Raker & Towns, 2012	CERP	Repeat
31	Shultz et al., 2022	Int J of STEM Educ	No	Instructors		31	Victor et al., 2021	Int J Res Educ Sci	Repeat
32	Niaz, 2008	Instructional Science	No	HS		32	Russell & Weaver, 2011	CERP	Repeat
33	Verdan et al., 2010	CERP	Repeat			33	Clough, 2011	Science & Education	No	Activity
34	Joglar & Rojas, 2019	Research in Science Education	No	HS		34	Saribas et al., 2013	Eurasia J of Math, Sci, Tech, Educ	Yes
35	Al-Balushi & Sulaiman, 2013	Eurasia Journal of Math, Science, and Tech Educ	No	Impact of different textual narratives on submicroscopic understanding		35	Witherspoon et al., 2019	Educational Researcher	No	Doesn't measure epistemology
36	Grove & Bretz, 2010	CERP	Repeat			36	McDonald, 2010	JRST	Repeat
37	Markic & Eilks, 2013	Int J Sci Math Educ	Yes			37	Richter-Egger et al., 2010	JCE	No	Course design
38	McDonald, 2013	Science Education International	Maybe	Argumentation. Unsure if measuring student epistemology or epistemology of lab material		38	Farre & Lorenzo, 2009	CERP	Repeat
39	Markic & Eilks, 2012	Int J Sci Ed	Yes			39	Markic & Eilks, 2012	Int J Sci Ed	Repeat
40	Chakraverty & Tai, 2013	Bulletin of Science, Technology, & Society	No	Scientistis		40	Vesterinen & Aksela, 2009	CERP	Repeat
41	Ezer, 2006	Journal of Information Technology Education	No	Curriculum comparison		41	Hoch et al., 2009	JCE	No	Course design
42	Crippen & Brooks, 2009	CERP	No	Activity		42	Borda et al., 2009	J Coll Sci Teach	No	Activity
43	Hofer, 2004	Contemporary Educational Psychology	Yes			43	Niaz, 2008	Instructional Science	Repeat	HS
44	Wickman, 2004	Sci Educ	Yes			44	Sanger, 2008	JCE	Repeat
45	Erduran et al., 2007	Science & Education	No	Just theory		45	Verdan et al., 2010	CERP	Repeat
46	Onen, 2011	Hacettepe University Journal of Education	Yes			46	Backhus & Thompson, 2006	J Sci Teach Educ	No	Faculty
47	Markic et al., 2008	Eurasia Journal of Math, Science, and Tech Educ	Yes			47	Kishbaugh et al., 2012	CERP	Repeat
48	Jimenez-Aleixandre & Regiosa, 2006	Sci Educ	No	HS		48	Domin, 2008	CERP	Repeat
49	Niaz, 2006	Interchange: A Quarterly Review of Education	No	HS		49	Friedrichsen et al., 2006	Sci Educ	Maybe
50	Watters & Watters, 2007	Int J Sci Ed	Yes			50	Taber, 2008	Int J Sci Educ	No	Conceptual understanding
51	Schwartz & Fischer, 2006	About Campus	No	No data		51	American Society for Biochemistry and Molecular Biology	Liberal Education	No	Commentary
52	Orozco et al., 2021	Journal of Vocational Education and Training	No	Vocational school
53	Justi & Gilbert, 2003	Int J Sci Ed	No	Instructors
54	McDonald, 2010	JRST	Repeat
55	Havdala & Ashkenazi, 2007	JRST	Repeat

## Sheet: JCE - 2nd Pass
Article	Include?	If no, why?	Study Population	Quick Summary
Adams et al., 2008	Yes		Undergraduates	Chem-CLASS
Aguirre-Mendez et al., 2020	Yes		Gen chem students	Scientific argumentation. Includes codes for epistemic understanding of an argument
Atieh & York, 2020	Yes		Gen chem students	Uses CLASS
Atieh et al., 2021	Yes		Gen chem students	Study habits. Some reliable processes and sources.
Burrows et al., 2021	Maybe		Biochem lab students	Perceptions of learning
Criswell & Rushton, 2012	No	HS
DeKorver & Towns, 2015	Maybe		Gen chem lab students	Cognitive goals for lab --> epistemic goals
Enneking et al., 2019	Maybe		Gen chem lab students	Some epistemic statements in survey
Finne et al., 2022	Yes		Pharmacy students	Epistemic importance emerged as a theme from interviews
Frey et al., 2017	Yes		Gen chem & ochem students	Abstraction vs. Exemplar learners
Galloway & Bretz, 2015	Yes		Gen chem & ochem students	Survey on lab learning. Some epistemic statements.
Galloway et al., 2016	No	Doesn't measure epistemology	Gen chem & ochem students	Focused on affective experiences in lab
Grooms et al., 2021	No	HS		Modeling, includes some metamodeling stuff
Grooms, 2020	Yes		Gen chem lab students	Scientific argumentation. Students describe nature of evidence.
Gurung et al., 2022	No	Textbooks
Heisterkamp & Talanquer, 2015	No	Doesn't measure epistemology	Gen chem student	Cognitive resources
Heredia & Lewis, 2012	Yes		Gen chem lab students	CLASS
Hosbein et al., 2021	No	Doesn't measure epistemology		Assessment development
Hosbein et al., 2021	Yes		Gen chem lab students	ASAC has epistemic subsection
Lazenby et al., 2019	Yes		Gen chem students	Metamodeling
Lazenby et al., 2020	Yes		Introductory chem students	Epistemic ideas for modeling
Liu et al., 2022	No	Doesn't measure epistemology	Pre-service teachers	Self-efficacy beliefs
Malinakova, 2022	Maybe		OChem students	Deep vs. surface learning
Mazzarone & Grove, 2013	Yes		Gen chem & ochem students	Epistemological development
Moozeh et al., 2019	Maybe			Perceptions of how video modules impacted learning.
Nagel & Lindsey, 2022	No	Doesn't measure epistemology		Structure of knowledge?
Pazinato et al., 2021	No	HS
Popova & Bretz, 2018	Yes		OChem students	Interpreted reasoning according to Perry's Scheme
Pratt & Yezierski, 2019	Maybe		Chem undergraduates	Beliefs about chemistry, teaching at outreach events
Sandi-Urena et al., 2012	Yes		Gen chem lab students	Metacognition
Sanger, 2008	Yes		Pre-service teachers	Nature of science
Santos & Mooring, 2022	No	Doesn't measure epistemology	Gen chem & ochem students	Mindset beliefs seem really affective here
Talanquer, 2017	No	Doesn't measure epistemology	Gen chem students	Prompts students to pick the wrong answer students are most likely to select. Claims this could be an intervention for switching students from Type I to Type II reasoning
Walker et al., 2019	Yes		Gen chem lab students	ASAC has epistemic subsection
Wang et al., 2021	No		Gen chem students	Growth mindset intervention but only performance and attitude measured
Young & Talanquer, 2013	Yes		Chem for nonmajors students	Talk moves that match epistemic activities
Zimmermann et al., 2021	No	Doesn't measure epistemology	Pre-service teachers	Pre-service teachers' self-efficacy related to technology

[truncated: 7 more sheets: CERP - 2nd Pass, JRST - 2nd Pass, Int J Sci Ed - 2nd Pass, Databases - 2nd Pass, 3rd Pass - All, 4th Pass - All, Final]
