# Supplementary material for: Modeling students’ epistemic cognition in undergraduate chemistry courses: a review
Source: Royal Society of Chemistry journal article supplement (doi:10.1039/d3rp00348e), 2024-01-01
Supplement: d3rp00348e2.xlsx [file d3rp00348e2.xlsx]

## Sheet: Part 1 Codes
Article	Study Population	Notes	Unit of Analysis	Methodology	Study Design
Adams et al., 2008	Non-course specific		individual	quantitative	intervention evaluation
Aglarci et al., 2016	Chem for pre-service teachers	pre-service chemistry teachers	individual	qualitative	intervention evaluation
Aguirre-Mendez et al., 2020	Intro chem	Gen chem students - non-majors	individual	mixed methods	correlational
Agustian, 2020	PChem	PChem lab students	individual	qualitative	exploratory
Becker et al., 2013	PChem	PChem students	group	qualitative	exploratory
Bowen et al., 2022	OChem	OChem students	individual	mixed methods	intervention evaluation
Burrows et al., 2017	OChem lab		individual	qualitative	exploratory
Calik & Cobern, 2017	Chem for pre-service teachers	pre-service elementary teachers in intro chem course designed for elementary ed majors	individual	mixed methods	intervention evaluation
Celik, 2020	Chem for pre-service teachers	pre-service chemistry teachers enrolled in a scientific research methods course	individual	qualitative	intervention evaluation
Chopra et al., 2017	Intro chem lab	Gen chem lab students	individual	qualitative	intervention evaluation
Christian & Talanquer, 2012	OChem	OChem students - science & engineering majors	group	qualitative	exploratory
Cigdemoglu et al., 2017	Intro chem	Pre-service teachers - enrolled in Gen Chem II	individual and group	mixed methods	intervention evaluation
Crujeiras-Perez & Brocos, 2021	Chem for pre-service teachers	science class for pre-service primary teachers; data comes from unit on environmental chem	group	qualitative	exploratory
Flaherty, 2020	OChem		individual	qualitative	exploratory
Gardner, 2017	Intro chem	Freshmen bio, chem, environ sci majors	individual	qualitative	intervention evaluation
Goff et al., 2012	Intro chem	Intro chem students - non-majors	individual	mixed methods	intervention evaluation
Grooms, 2020	Intro chem lab	Gen chem lab students	individual	mixed methods	intervention evaluation
Grove & Bretz, 2010	OChem		individual	qualitative	longitudinal
Grove & Bretz, 2012	OChem		individual	qualitative	longitudinal
Havdala & Ashkenazi, 2007	Intro chem lab	Gen chem lab students	individual	qualitative	exploratory
Hofer, 2004	Non-course specific	Gen chem & ochem students	individual	qualitative	exploratory
Hosbein et al., 2021	Intro chem lab	Gen chem lab students	group	mixed methods	longitudinal
Hunter et al., 2021	Intro chem	Gen chem students - science and engineering majors	group	qualitative	exploratory
Karch & Sevian, 2022	PChem	PChem students	individual and group	qualitative	exploratory
Keen & Sevian, 2021	Intro chem	Gen chem students	individual	qualitative	exploratory
Kelly et al., 2021	Intro chem	Gen chem students	individual	qualitative	exploratory
Kulatunga et al., 2013	Intro chem	Gen chem students	group	mixed methods	exploratory
Lazenby et al., 2019	Intro chem	Intro chem students	individual	mixed methods	exploratory
Lazenby et al., 2020a	Intro chem	Intro chem students	individual	qualitative	exploratory
Lazenby et al., 2020b	Intro chem	Intro chem students	individual	qualitative	exploratory
Lee et al., 2022	Intro chem	Gen chem students	individual	quantitative	correlational
Li et al., 2013	Non-course specific	Chem majors	individual	quantitative	correlational
Lopez et al., 2014	OChem	OChem students	individual	mixed methods	correlational
Manneh et al., 2018	Intro chem	Intro chem students	group	qualitative	exploratory
Marchlewicz & Wink, 2011	Intro chem	Gen chem students	individual	qualitative	intervention evaluation
Mazzarone & Grove, 2013	Non-course specific	Gen chem & ochem students	individual	qualitative	longitudinal
McDonald, 2010	Chem for pre-service teachers	pre-service primary teachers in science content course	individual	qualitative	intervention evaluation
Moon et al., 2019	Intro chem	Gen chem - engineering & undeclared majors	individual	mixed methods	exploratory
Pabuccu & Erduran, 2017	OChem	Pre-service teachers - enrolled in ochem	group	qualitative	intervention evaluation
Petritis et al., 2021	OChem lab		individual and group	mixed methods	intervention evaluation
Petritis et al., 2022	OChem lab		individual and group	mixed methods	exploratory
Rodriguez et al., 2020	Intro chem	Gen chem students - science & engineering majors	individual	qualitative	exploratory
Russell & Weaver, 2011	Intro chem	Gen chem students	individual	qualitative	intervention evaluation
Saribas et al., 2013	Intro chem lab	Chem lab course - sci ed department	individual	mixed methods	intervention evaluation
Sendur et al., 2017	Chem for pre-service teachers	pre-service chemistry teachers enrolled in a history and philosophy of chemistry course	individual	qualitative	intervention evaluation
Sevian & Coutre, 2018	Non-course specific		individual	qualitative	exploratory
Shultz & Gere, 2015	Intro chem	Gen chem students	individual	mixed methods	intervention evaluation
Sinapuelas & Stacy, 2015	Intro chem	Intro chem students - non-majors	individual	mixed methods	correlational
Talanquer, 2010	Intro chem	Gen chem students	individual	qualitative	exploratory
Venessa et al., 2019	Chem for pre-service teachers	pre-service chemistry teachers	individual	qualitative	exploratory
Walker & Sampson, 2013	Intro chem lab	Gen chem lab students	individual and group	mixed methods	longitudinal
Walker et al., 2019	Intro chem lab	Gen chem lab students	individual and group	qualitative	exploratory
Wickman, 2004	Intro chem	Intro chem students	group	qualitative	exploratory

## Sheet: Data Collection Codes
Article	Data Sources	Notes	Explicitness	Notes
Adams et al., 2008	Selected-response survey	CLASS-CHEM	Explicit
Aglarci et al., 2016	Open-ended survey	VNOS Form-C	Explicit	VNOS
Aglarci et al., 2016	Interview	Semi-structured interviews	Explicit	Based on VNOS
Aguirre-Mendez et al., 2020	Written artifact	Argumentative writing assignments	Explicit	Assignments ask students to directly state their claim and evidence.
Aguirre-Mendez et al., 2020	Open-ended survey	7 open-ended questions	Explicit	Probed understanding of chemistry & argumentation, the nature of claims and evidence, importance of writing personally and scientifically
Agustian, 2020	Open-ended survey	VNOS	Explicit	VNOS
Agustian, 2020	Interview	Semi-structured interviews	Explicit
Becker et al., 2013	Classroom recording	Whole class and small group discussions	Implicit	Epistemic criteria for explanations
Bowen et al., 2022	Open-ended survey	3 open-ended questions	Implicit	Questions about ochem class
Burrows et al., 2017	Interview	Semi-structured interviews	Implicit	Asked about experiences in lab. Doesn't ask about "lab persona" directly
Calik & Cobern, 2017	Selected-response survey	Scientific Habits of Mind (Likert scale)	Explicit	SHOM (see appendix)
Celik, 2020	Open-ended survey	VNOS-C	Explicit
Chopra et al., 2017	Interview	Semi-structured interviews	Implicit
Christian & Talanquer, 2012	Classroom recording	Audio study group dialogue	Implicit	Observations of study groups
Cigdemoglu et al., 2017	Open-ended survey	Chemical literacy	Implicit	See Appendix A
Cigdemoglu et al., 2017	Classroom recording	Argumentation sessions	Implicit
Cigdemoglu et al., 2017	Written artifact	Lab reports	Implicit
Crujeiras-Perez & Brocos, 2021	Classroom recording	Small group dialogue	Implicit
Crujeiras-Perez & Brocos, 2021	Written artifact	Written claim and justifications	Implicit
Flaherty, 2020	Interview	Semi-structured interviews	Explicit	Questions are about what scientists do, how scientists would respond to a study, whether they learned science in line with what scientists do, and how oclue compared to their other science classes
Gardner, 2017	Open-ended survey	VNOS	Explicit	VNOS
Gardner, 2017	Interview		Explicit	Based on VNOS
Goff et al., 2012	Open-ended survey	VNOS Form-C	Explicit
Goff et al., 2012	Interview	Semi-structured interviews	Explicit
Grooms, 2020	Written artifact		Implicit	Written arguments
Grooms, 2020	Open-ended survey	What is data? What is evidence?	Explicit
Grove & Bretz, 2010	Written artifact	Reflective essays about goals and expectations for ochem	Implicit
Grove & Bretz, 2010	Interview	Semi-structured interviews	Implicit
Grove & Bretz, 2012	Written artifact	Reflective essays	Explicit	Reflective interviews asked students about their goals for learning chemistry and later their reflections on their experiences
Grove & Bretz, 2012	Interview	Semi-structured interviews	Explicit
Havdala & Ashkenazi, 2007	Interview	Semi-structured interviews	Explicit	See appendix
Havdala & Ashkenazi, 2007	Written artifact	Lab reports	Implicit
Hofer, 2004	Interview		Explicit	The interview protocol was not shared, but based on the questions embedded in the manuscript, they were explicitly about epistemology in general.
Hosbein et al., 2021	Classroom recording		Implicit	Codes based on dialogue
Hunter et al., 2021	Interview	group	Implicit	Clinical interviews, aka stimulated POGIL discussion
Karch & Sevian, 2022	Interview	Individual and paired	Implicit	Epistemic actions inferred from interviews where students were asked to solve pchem problems
Kaufman et al., 2017	Interview	Think-aloud interviews of pairs of students	Implicit
Keen & Sevian, 2021	Classroom recording		Implicit
Keen & Sevian, 2021	Open-ended survey	share a time when you struggled in lab	Implicit
Keen & Sevian, 2021	Interview	video-stimulated recall	Implicit
Kelly et al., 2021	Interview	Think-aloud interviews	Implicit
Kulatunga et al., 2013	Classroom recording	POGIL discussions	Implicit	Structure of arguments during POGIL
Lazenby et al., 2019	Open-ended survey	Models in Chemistry Survey (MCS); mostly open-ended items, a few y/no questions w/ follow-ups	Explicit
Lazenby et al., 2020a	Open-ended survey	Mostly open-ended	Explicit	MCS survey
Lazenby et al., 2020b	Open-ended survey	MCS	Explicit	Questions include "Do models change?" and "Do you think two scientists could come up with two different models for the same real-world observation?"
Lee et al., 2022	Selected-response survey	25 items on eistemological beliefs; 5-point Likert scale	Explicit	e.g., "knowledge is not given down by authority but can be tested"
Li et al., 2013	Selected-response survey	Likert scale	Explicit	See appendix
Lopez et al., 2014	Interview	Concept maps	Explicit	Make a concept map connecting the following terms
Manneh et al., 2018	Classroom recording	Small groups	Implicit	Analysis of dialogue
Marchlewicz & Wink, 2011	Open-ended survey	VNOS Form-C	Explicit	VNOS, writing prompts
Marchlewicz & Wink, 2011	Written artifact	4 writing assignments	Explicit	Mostly
Mazzarone & Grove, 2013	Selected-response survey	CHEMX	Explicit
Mazzarone & Grove, 2013	Interview	Semi-structured interviews	Explicit	Interviews use CHEMX items
McDonald, 2010	Open-ended survey	VNOS Form-C	Explicit	VNOS, interview prompts
McDonald, 2010	Open-ended survey	Global warming and semiconductor surveys	Implicit
McDonald, 2010	Interview	Semi-structured interviews	Explicit	Based in part on VNOS
McDonald, 2010	Classroom recording		Implicit
McDonald, 2010	Written artifact	Global warming essay and lab report	Implicit
Moon et al., 2019	Written artifact	WTL assignment about equilibria	Implicit	Structure of reasoning in writing
Pabuccu & Erduran, 2017	Written artifact		Implicit
Pabuccu & Erduran, 2017	Classroom recording	Small group dialogue	Implicit
Petritis et al., 2021	Written artifact	Lab reports	Implicit
Petritis et al., 2022	Written artifact	Lab reports	Implicit
Rodriguez et al., 2020	Interview	Think-aloud interviews	Implicit
Russell & Weaver, 2011	Interview	Semi-structured interviews	Explicit	Questions modified from VNOS-C
Saribas et al., 2013	Open-ended survey	VNOS Form-C	Explicit
Sendur et al., 2017	Open-ended survey	"Chemistry is like (blank) because (blank); a chemist is like (blank) because (blank)."	Implicit
Sendur et al., 2017	Interview	Semi-structured interviews	Explicit	They were asked about their prior knowledge of chemistry and chemists and why their creative comparisons changed
Sevian & Coutre, 2018	Open-ended survey	Open-ended	Implicit
Sevian & Coutre, 2018	Interview	Semi-structured interviews	Implicit	Asked to explain responses to questionnaire
Shultz & Gere, 2015	Open-ended survey	VNOS	Explicit	VNOS
Sinapuelas & Stacy, 2015	Interview	Semi-structured interviews	Explicit	Questions like "how did you study? What was most helpful? Did you use [resource]? Was your grade what you expected?"
Talanquer, 2010	Open-ended survey	quizzes asking for explanations for phenomena, for participation credit in course	Implicit
Venessa et al., 2019	Selected-response survey	7 MC, 1 open-ended	Explicit	VNOST
Walker & Sampson, 2013	Classroom recording	Argumentation sessions	Implicit
Walker & Sampson, 2013	Written artifact	Lab reports, performance tasks (performing an experiment and making an argument based on the data collected; not clear what was graded)	Implicit
Walker et al., 2019	Classroom recording	Argumentation sessions	Implicit
Walker et al., 2019	Interview	"How do you determine if a claim is valid or acceptable? Is it okay to modifiy claims? Why or why not?"	Explicit
Wickman, 2004	Classroom recording	Student and teacher dialogue	Implicit

## Sheet: Part 2 Codes
Article	Hierarchy Code	Notes	Stability Code	Notes	Explicitness Code	Notes	Inferred Model of Epistemic Cognition	Notes	Stated Model of Epistemic Cognition	Notes
Adams et al., 2008	Hierarchical	The authors describe their analysis as follows: "An individual student’s “Overall percent favorable” score is the percentage of responses for which the student agrees with the expert response (including only those statements where experts have consistent views—45 of 50). Similarly, the “Overall percent unfavorable” score is the percentage of responses for which the student disagrees with the expe…	Stable	Pre-post design	Explicit	Data was collected using the CLASS-CHEM survey, which contained agree/disagree items such as "Knowledge in chemistry consists of many disconnected topics."	Developmental or Dimensional	All codes consistent with developmental or dimensional model
Aglarci et al., 2016	Hierarchical	Responses were coded as Naïve, Informed, or Eclectic (see p. 5). Informed > Eclectic > Naïve.	Stable	Pre-post design	Explicit	Data was collectd using the Views on the Nature of Science questionnaire, which asks students directly for their beliefs, coupled with interviews based on those items.	Developmental or Dimensional	All codes consistent with developmental or dimensional model
Aguirre-Mendez et al., 2020	Hierarchical	Each component of a student's argument was rated on a scale of 0-3 where 0 = lacking and 3=proficient (see p. 2049). Number ratings are assumed to be hierarchical unless specifically stated otherwise.	Unclear	I could find no evidence on which to make a claim about stability.	Explicit	Assignments ask students to directly state their claim and evidence. Survey probed understanding of chemistry & argumentation, the nature of claims and evidence, importance of writing personally and scientifically.	Developmental or Dimensional	Two codes consistent with a developmental or dimensional model with one code not associated with any model
Agustian, 2020	Hierarchical	Responses were coded as Naïve, Transitional, Informed (see p. 65). These are described as "levels of understanding" with Informed > Transitional > Naïve.	Unclear	Author describes the purpose of the study as getting a"glimpse" of students' views rather than measuring changes, but I think that means no intervention, not that they ascribe to a resources view (p. 68).	Explicit	Data was collectd using the Views on the Nature of Science questionnaire, which asks students directly for their beliefs, coupled with interviews based on those items.	Developmental or Dimensional	Two codes consistent with a developmental or dimensional model with one code not associated with any model
Becker et al., 2013	Variable utility	Sociochemical norms were negotiated in the classroom and the kind of justification that was "best suited" or "most appropriate" dependended on context: "This was likely because the type of particulate evidence that was best suited for making a claim about entropy was not necessarily the type of evidence that would be most appropriate for reasoning about another topic like heat capacity." (p. 89)	Unstable	"Due to differences in the content discussed, sociochemical norms related to reasoning using particulate-level descriptions of matter broadened to include new ways of using particulate explanations for new content topics" (p. 89)	Implicit	Epistemic criteria for explanations were inferred from group dialogue.	Resources	All codes consistent with resources model
Bowen et al., 2022	Ambiguous	Theoretical framework describes how students' resources may more or less productive depending on the task (p. 563), but the Findings include the following statement: "Although we did not set out to develop a hierarchical model of categories during the analysis, the progression from 'Memorization' to 'Apply and Reason' does suggest a greater degree of sophistication in students' perceptions of how…	Unstable	"With this, we also ascribe to the resources perspective which asserts that students have knowledge that is connected in various ways which may or may not be activated when prompted depending on their knowledge structure and how the task is scaffolded." (p. 563)	Both	Students were asked 3 questions: 1) How would you describe the way you were expected to think about mechanisms, 2) What would you say was the most difficult part of ochem, and 3) How would you describe what was assessed? Question #1 was explicit while questions #2 and #3 were used to elicit more evidence for #1, albeit implicitly.	Unknown	Not enough information to infer a model of cognition.	Resources	"With this, we also ascribe to a resources perspective..." (p. 563)
Burrows et al., 2017	Hierarchical	Lab personas were ordered in terms of increasing complexity (see Fig. 2). Quote from p. 819: "In this study, we define the outcome space as a developmental progression."	Unclear	I could find no evidence on which to make a claim about stability.	Implicit	Interviews probed students experiences in ochem lab. From these, lab personas were constructed. Students were not asked directly about lab personas.	Unknown	One code consistent with developmental or dimensional model, one code consistent with resources model, and one code ambiguous
Calik & Cobern, 2017	Hierarchical	The authors observe "better gains" in students' scores on surveys (p. 703).	Stable	Pre-post design	Explicit	Scientific Habits of Mind (Likert scale) survey used. See Appendix.	Developmental or Dimensional	All codes consistent with developmental or dimensional model
Celik, 2020	Hierarchical	Responses were coded, in order of increasing sophistiction, as Uninformed, Syncretic(-), Syncretic (+), or Informed (see p. 319).	Stable	Pre-post design	Explicit	Data was collected using the Views on the Nature of Science questionnaire, which asks students directly for their beliefs.	Developmental or Dimensional	All codes consistent with developmental or dimensional model
Chopra et al., 2017	Ambiguous	I could find no evidence on which to make a claim about value.	Unclear	I could find no evidence on which to make a claim about stability.	Explicit	Interview protocol contained a section that asked students about their conceptions of learning with questions like "How do you think students would learn best in General Chemistry Lab?"	Unknown	Not enough information to infer a model of cognition.
Christian & Talanquer, 2012	Hierarchical	Codes describe level of content processing, with some codes classified a low-level and others as high-level (see Table 2 and p. 2246).	Unstable	"The types of social regulation processes and the levels of content processing observed in each study session were influenced by factors related to both the group’s composition and the nature of the tasks in which the students were engaged." (p. 2246)	Implicit	Students' dialogue in study groups was collected. From this data, levels of content processing were inferred.	Unknown	Hieararchy code is consistent with a developmental or dimensional model while stability and explictness codes are consistent with a resources model
Cigdemoglu et al., 2017	Hierarchical	Part of video data analysis included classifying arguments as "basic" or "high-level." This was based on whether or not the arguments included rebuttals and backings in addition to claims, datas, and warrants.	Stable	Argumentation levels were graphed as a function of time (Fig. 2).	Implicit	Structure of argument claims were based on classroom dialogue and written lab reports.	Developmental or Dimensional	Hierarchy and stability codes are consistent with a developmental or dimensional model
Crujeiras-Perez & Brocos, 2021	Hierarchical	Authors invoke levels of sophistication: "However, the most sophisticated level, which corresponds to the participants' use of of explicit criteria and their justifications for said usage, accounted for 26% of the episodes..." (p. 242)	Unclear	I could find no evidence on which to make a claim about stability.	Implicit	Quality of argument claims were based on classroom dialogue and written arguments.	Unknown	One code consistent with developmental or dimensional model, one code consistent with resources model, and one code ambiguous
Flaherty, 2020	Hierarchical	Author states in the Findings: "It will become apparent throughout the discussion of students' responses that OCLUE contributed to the development of a more sophisticated proximal knowledge of the structure and development of scientific knowledge" (p. 575). Later the author also states that "more sophisticated epistemologies of science can lead to better learning outcomes and experiences" (p. 579…	Unstable	Author states, "Readers should be encouraged to bear in mind that students’ personal epistemologies detailed in this paper are not coherent or stable cognitive structures, rather, that they are constantly evolving as the students grow and mature (Sandoval, 2005)." (p. 575)	Explicit	Questions are about what scientists do, how scientists would respond to a study, whether they learned science in line with what scientists do, and how oclue compared to their other science classes	Unknown	Hieararchy code is consistent with a developmental or dimensional model while stability code is consistent with a resources model
Garcia-Carmona et al., 2017	Hierarchical	Responses ranked from 0-4. "The highest level (level 4) corresponded to the most complete responses, with adequate allusions to all of the characteristic indicators of NOS content tht were recognizable in the story of the controversy. With this maximum level as referent, the classification of the responses decreased in level depending on how incomplete they were (some reasons not mentioned, the a…	Stable	Pre-post design	Explicit	Data on nature of science beliefs was obtained through observations of class discussion, where the instructor asked students about their nature of science beliefs, and written responses to those same questions.	Developmental or Dimensional	All codes consistent with developmental or dimensional model
Gardner, 2017	Hierarchical	Responses were coded as Naïve, Informed, or Eclectic (see p. 5). Informed > Eclectic > Naïve.	Stable	Pre-post design	Explicit	Data was collected using the Views on the Nature of Science questionnaire, which asks students directly for their beliefs, coupled with interviews based on those items.	Developmental or Dimensional	All codes consistent with developmental or dimensional model
Goff et al., 2012	Hierarchical	The coding scheme followed the methods used by Lederman et al. (2002) and Schwartz et al. (2004) classifying responses predominantly as naïve/uninformed, limited, and informed." (p. 638)	Stable	Pre-post design	Explicit	Data was collected using the Views on the Nature of Science questionnaire, which asks students directly for their beliefs, coupled with interviews based on those items.	Developmental or Dimensional	All codes consistent with developmental or dimensional model
Grooms, 2020	Hierarchical	Arguments are assigned a code of 0, 1, 2, 3, or 4 based on the number of elements (e.g., reasons, rationales, rebuttals). See Table 4.	Stable	Pre-post design	Both	Written arguments were collected from students (implicit). A follow-up survey asked students about their views on data and evidence (explicit).	Developmental or Dimensional	Hierarchy and stability codes are consistent with a developmental or dimensional model
Grove & Bretz, 2010	Hierarchical	Perry's Scheme is invoked (p. 207), and some students are described as "not yet epistemologically matured" (p. 210).	Stable	Students' epistemological beliefs are intepreted through Perry's Scheme. This includes development over time, with different stages corresponding to age (p. 210).	Implicit	Data was obtained in the form of reflective essays abou their experiences in ochem and interviews about those essays. These prompts seem vague, but they are not given anywhere in the article.	Developmental or Dimensional	Hierarchy and stability codes are consistent with a developmental or dimensional model	Developmental	See description under heading "Epistemological development and learning chemistry" on p. 207
Grove & Bretz, 2012	Hierarchical	Students are assigned to quadrants based on their metacognitive awareness and approaches to learning (see p. 206 and Fig. 1). I am assuming that Meaningful Learners are considered "better" than Unaware Learners, Indifferent Learners, and Traditional Learners (who are on a trajectory towards Meaningful Learners).	Unclear	I could find no evidence on which to make a claim about stability.	Implicit	Data was obtained in the form of reflective essays abou their experiences in ochem and interviews about those essays. These prompts seem vague, but they are not given anywhere in the article.	Unknown	One code consistent with developmental or dimensional model, one code consistent with resources model, and one code ambiguous
Havdala & Ashkenazi, 2007	Hierarchical	One of the theoretical implications discussed on p. 1156 is that there is not a single developmental path from naïve to informed views of NOS but multiple. This maintains a hierarchical organization of views.	Unclear	Authors use the term "epistemological theory", which implies stability, and observe coherence between multiple dimensions of epistemology. On the other hand, they acknowledges that epistemologies are domain specific rather than universal.	Both	Data was collected via lab reports (implicit) and interviews, in which studens were asked about their epistemological beliefs directly (explicit).	Unknown	Not enough information to infer a model of cognition.	Dimensonal	"We used the dimensions of personal epistemology, as discussed in the theoretical framework, to reorganize the descriptive categories of the first phase into coherent epistemological theories." (p. 1140)
Hofer, 2004	Hierarchical	The lower and higher levels for each dimension of epistemology are discussed.	Stable	Pre-post design	Explicit	The interview protocol was not shared, but based on the questions embedded in the manuscript, they were explicitly about general epistemology.	Developmental or Dimensional	All codes consistent with developmental or dimensional model	Dimensional	"The analyses below are organized by epistemological dimension (simplicity, certainty, source, and justification)." (p. 143)
Hosbein et al., 2021	Hierarchical	Argumentation scores "improve" to be more consistent with expert arguments (p. 1885)	Unclear	This study does look at change over time but collects data at five timepoints during semester. Because it involves a more fine-grained approach than pre-post experimental designs, I decided to code this as ambiguous.	Implicit	Data was collected in the form of classroom dialogue. Codes describing the epistemic aspects of argumentation were applied to this data.	Unknown	One code consistent with developmental or dimensional model, one code consistent with resources model, and one code ambiguous
Hunter et al., 2021	Ambiguous	I could find no evidence on which to make a claim about value.	Unstable	"This [resources] perspective posits that students thinking about a concept is more than a unitary, stable cognitive unit, but rather comprised of many fine-grained cognitive resources that are activated within specific contexts" (p. 330).	Implicit	Epistemic games were inferred based on students' discussion in a POGIL-like interview setting.	Resources	Two codes consistent with a resources model with one code not associated with any model
Karch & Sevian, 2022	Ambiguous	This study identified epistemic actions but never stated whether these were equivalent or differed in value.	Unstable	"That is, abstract is considered relative to the problem space, rather than something that can be defined absolutely, i.e., we do not consider a piece of knowledge to be inherently abstract or inherently concrete" (p. 70). "However, while previous studies of abstraction have focused on the acquisition of stable concepts (Sfard, 1991; White and Mitchelmore, 2010), and on the use of abstracting to …	Implicit	Epistemic actions were inferred from interviews where students were asked to solve pchem problems.	Resources	Two codes consistent with a resources model with one code not associated with any model
Keen & Sevian, 2021	Variable utility	Productive depends on context. See "Productivity in general chemistry laboratory" section on page 31.	Unstable	Frame shifts observed over course of discussion.	Implicit	Data was collected via classroom recordings, surveys, and interviews. From these three sources of data, epistemic struggles in the laboratory were inferred.	Resources	All codes consistent with resources model
Kelly et al., 2021	Variable utility	Resource activation can be productive or unprductive depending on context: "However, when we are first learning, it is not uncommon for beginning students to develop naïve epistemologies, meaning that they draw on context dependent resources that can be activated appropriately or inappropriately" (p. 888).	Unstable	Authors used a resources theoretical framework and stated in their Conclusions, "Our findings revealed that students sometimes shifted between their resources and sometimes they misapplied them." (p. 901)	Implicit	Epistemic stances were inferred from students' dialogue in interviews.	Resources	All codes consistent with resources model	Resources	See Theoretical Framework on p. 888
Kulatunga et al., 2013	Hierarchical	Arguments are assigned levels based on the number of components (see Table 1).	Unclear	I could find no evidence on which to make a claim about stability.	Implicit	Claims about argument structure were made based on classroom recording data.	Unknown	One code consistent with developmental or dimensional model, one code consistent with resources model, and one code ambiguous
Lazenby et al., 2019	Ambiguous	In the Theoretical Perspectives section, the authors state: "it is the context in which [the resources] are activated that determines whether students' ideas are productive or unproductive for making sense of the world" (p. 456). Later, however, they state: "We do, however, agree that recognizing the explantory and predictive power of models is more expert-like and aligned with the realistic use …	Unstable	Authors state in the Theoretical Perspectives section: "Students’ epistemological resources are neither stable nor inherently correct or incorrect; rather, they are dynamic and highly sensitive to context, and it is the context in which they are activated that determines whether students’ ideas are productive or unproductive for making sense of the world." (p. 456). They also examine the influenc…	Explicit	Survey included questions such as "Do models change?" and "Do you think two scientists could come up with two different models for the same real-world observation?"	Unknown	One code consistent with developmental or dimensional model, one code consistent with resources model, and one code ambiguous	Resources	See Theoretical Perspectives on p. 456
Lazenby et al., 2020a	Ambiguous	In the Theoretical Perspectives section, the authors state: "The interplay between context and activation determines whether students' ideas are productive for sense-making about the natural world" (p. 18). Later, however, they state: "While we agree that recognizing the significance of generative activities (e.g., constructing explanations for and predictions of natural events) reflects a more s…	Unstable	Authors observe, "Our analysis indicates that although students’ conceptual resources are potentially productive, they are highly sensitive to context, as evidenced by the variation in themes across domain-general and chemistry-specific tasks." (p. 24)	Explicit	Survey included questions such as "Do models change?" and "Do you think two scientists could come up with two different models for the same real-world observation?"	Unknown	One code consistent with developmental or dimensional model, one code consistent with resources model, and one code ambiguous	Resources	See Theoretical Perspectives on p. 18
Lazenby et al., 2020b	Hierarchical	Students' responses were sorted into levels reflecting different sophistications (see Table 7).	Unstable	Authors invoke the resources model in their Theoretical Perspectives section: "Importantly, the resources perspective argues that activation of epistemological resources may be context-dependent, which is consistent with previous studies on context-specificities of students' metamodeling knowledge (e.g., Gobert et al., 2011; Krell et al., 2014)." (p. 797)	Explicit	Survey included questions such as "Do models change?" and "Do you think two scientists could come up with two different models for the same real-world observation?"	Unknown	Hieararchy code is consistent with a developmental or dimensional model while stability code is consistent with a resources model	Resources	See section 3.1
Lee et al., 2022	Hierarchical	Students were sorted into high, mid, and low groups based on their scores on an epistemological beliefs survey (p. 218).	Unclear	I could find no evidence on which to make a claim about stability.	Explicit	Survey contained 25 Likert-style items on eistemological beliefs. An example item is "Knowledge is not given down by authority but can be tested."	Developmental or Dimensional	Two codes consistent with a developmental or dimensional model with one code not associated with any model
Li et al., 2013	Hierarchical	Conceptions of learning chemistry were grouped into lower-level and higher-level conceptions (p. 556).	Unclear	I could find no evidence on which to make a claim about stability.	Explicit	Survey contained Likert-style items such as "When I learn new contexts about chemistry, I am trying to explore the relationships with other contexts I learned before."	Developmental or Dimensional	Two codes consistent with a developmental or dimensional model with one code not associated with any model
Lopez et al., 2014	Hierarchical	The authors state: "As students develop a more conceptual understanding in a domain, the structure of their knowledge becomes more interrelated (Shavelson et al., 2005) and increasingly resembles the structure of experts’ knowledge (Nash, Liotta, & Bravaco, 2000)." (p. 754). The expert-novice description is consistent with a hierarchical viewpoint.	Stable	This is inferred from their hypothesis that students in different ethnic groups may have different knowledge structures. In my opinion, this implies stablility.	Explicit	Students were instructed to make a concept map connecting a given set of terms, which means they were consciously thinking about structure of knowledge.	Developmental or Dimensional	All codes consistent with developmental or dimensional model
Manneh et al., 2018	Variable utility	The productivity of bringing in certain knowledge depended on context: "Moreover, this gap shows that the tutor’s purpose of helping students understand the negative charge of CN by drawing molecular orbital diagram, although successful in the context of sequence 3, was not helping the students when there had been a shift in focus of the molecule" (p. 2035).	Unstable	Authors describe how epistemic aims can change over course of discussion period: "As we will show, the ensuing interaction was characterised by distinctions which moved the focus of the discussion in and out of the molecule, as well as by concomitant shifts concerning which purposes that were pursued by the students and the tutor." (p. 2030)	Implicit	Claims were based on observations of student dialogue as they solved chemisry problems.	Resources	All codes consistent with resources model
Marchlewicz & Wink, 2011	Hierarchical	"Student responses were coded as naïve or informed with regard to students’ views concerning the myth of a universal scientific method." (p. 1044)	Stable	Pre-post design	Explicit	Data was collected using the Views on the Nature of Science questionnaire, which asks students directly for their beliefs. Students' responses on written assignments were also collected. These prompts were explicitly about NOS (e.g., "Describe how scientific knowledge is created. Do all scientists follow the same approach?").	Developmental or Dimensional	All codes consistent with developmental or dimensional model
Mazzarone & Grove, 2013	Hierarchical	Authors described changes in maturity of views: "During the first semester of general chemistry, we recorded nearly ten large shifts per student: 70.2% were negative, that is, students indicated a less mature view of some aspect of learning chemistry at the end of the semester than when they started." (p. 971)	Stable	Pre-post design	Explicit	Data was collected via th CHEMX survey, which contained Likert-style items, and interviews based on the survey items. An example survey item is "The most crucial thing in solving a chemistry problem is finding the right equation to use."	Developmental or Dimensional	All codes consistent with developmental or dimensional model
McDonald, 2010	Hierarchical	A hierarchical coding scheme was used: "Participants’ views of the examined aspects of NOS in this study were coded on a continuum, as either naı ̈ve, limited, partially informed, or informed; where naive or limited views of NOS represented less desirable understandings, and partially informed or informed views of NOS represented more desirable understandings." (p. 1150)	Unclear	Pre-post design (stable over time). Authors also note that epistemic cognition is unstable across contexts: "These findings are consistent with those of Leach et al. (2000) who proposed that participants can draw on multiple forms of epistemological reasoning in differing contexts, and the application of particular forms of epistemological reasoning may be more or less appropriate depending on th…	Both	Data was collected using the Views on the Nature of Science questionnaire, which asks students directly for their beliefs, and interviews based on the questionnaire (explicit). Students written artifacts from class were also collected; these were used to make inferences about argumentation (implicit).	Unknown	Not enough information to infer a model of cognition.
Moon et al., 2019	Hierarchical	"The cognitive operations are ordered in Table 1 according to increasing cognitive complexity; that is, a definition has the lowest cognitive complexity (1) whereas argumentation has the highest cognitive complexity (10)." (p. 488)	Unclear	I could find no evidence on which to make a claim about stability.	Implicit	Structure of reasoning was inferred from students' writing assignments.	Unknown	One code consistent with developmental or dimensional model, one code consistent with resources model, and one code ambiguous
Pabuccu & Erduran, 2017	Hierarchical	Argument quality was assessed using a framework consisting of a "hierarchy of increasing quality of rebuttals applied to a set of five levels of argumentation" (p. 1160).	Unstable	The authors document changes in epistemic frame over course of a discussion.	Implicit	Data was collected via classroom recordings and students' written arguments. These were used to make inferences about epistemic frames and argument structure.	Unknown	Hieararchy code is consistent with a developmental or dimensional model while stability and explictness codes are consistent with a resources model
Petritis et al., 2021	Hierarchical	Students in one treatment group were described as having "more sophisticated" reasoning (p. 118). In addition, value seemed implied with some of the codes (e.g., misaligned vs. aligned).	Unstable	Auhors state: "More recent studies support this notion and demonstrate that different learning environments activate different cognitive resources as students seek to make sense of the phenomena they study (Berland and Reiser, 2011; Conlin et al., 2010; Elby and Hammer, 2010; Scherr and Hammer, 2009)." (p. 107). They then examine the influenced of lab framing on student' arguments.	Implicit	Impact of framing on argumentation was assessed based on students' written lab reports.	Unknown	Hieararchy code is consistent with a developmental or dimensional model while stability and explictness codes are consistent with a resources model
Petritis et al., 2022	Hierarchical	Within each coding category, one code corresponded to a higher quality argument while the other corresponded to a lower quality argument (see p. 260).	Unstable	Authors found: "On the other hand, our analysis suggested that the amount and type of data sources available to students in an experiment as well as the degree of scaffolding provided greatly impacted both the nature and quality of the arguments they constructed." (p. 271)	Implicit	Impact of framing on argumentation was assessed based on students' written lab reports.	Unknown	Hieararchy code is consistent with a developmental or dimensional model while stability and explictness codes are consistent with a resources model
Rodriguez et al., 2020	Variable utility	Authors state that one epistemic game is not inherently better than the other: "Thus, specific epistemic games are not problematic on their own, but issues arise when students have difficulty switching between games" (p. 15).	Unstable	Authors state: "Education (and research) informed by the resources perspective is characterized by understanding the resources that are activated by a context and providing support to help students to activate and use productive resources and develop sophisticated connections among resources (Becker et al. 2017)." (p. 17)	Implicit	Epstemic games were inferred from students' reasoning during think-aloud interviews.	Resources	All codes consistent with resources model	Resources	See Theoretical Perspectives on p. 5
Russell & Weaver, 2011	Hierarchical	In their conclusions, the authors state: "however, students in the research-based curriculum more often developed sophisticated conceptions of the nature of science than students in either the traditional or inquiry-based cohorts." (p. 65)	Stable	Pre-post design	Explicit	Interview questions were based on the Views on the Nature of Science questionnaire, which asks students directly for their beliefs.	Developmental or Dimensional	All codes consistent with developmental or dimensional model
Saribas et al., 2013	Hierarchical	The authors conclude: "Concerning the influence of the course on NOS views, results from VNOS-C show that the course did not result in improved NOS views. In other words, the pre-service science teachers retained typical misconceptions about NOS after treatment (McComas, 1996)." (p. 87)	Stable	Pre-post design	Explicit	Data was collected using the Views on the Nature of Science questionnaire, which asks students directly for their beliefs.	Developmental or Dimensional	All codes consistent with developmental or dimensional model
Sendur et al., 2017	Ambiguous	I could find no evidence on which to make a claim about value.	Stable	Pre-post design	Implicit	Students were asked to fill in the blanks in the follow statements: "Chemistry is like (blank) because (blank); a chemist is like (blank) because (blank)." Semi-structured interviews were conducted to gain more information about students' survey responses. The themes used in data analysis were inferred from students' statements but were not asked about directly on the survey or in the interviews.	Unknown	One code consistent with developmental or dimensional model, one code consistent with resources model, and one code ambiguous
Sevian & Coutre, 2018	Variable utility	The authors describe and utilize the resources model, including the rejection of inherent sophistication (p. 1031).	Unstable	Authors note the context sensitivity of resource activation in their introduction (p. 1031).	Implicit	Epistemic games were inferred from students' reasoning on an open-ended survey and in follow-up interviews.	Resources	All codes consistent with resources model	Resources	"In the resources framework within which this approach to studying learning falls (Hammer et al., 2005), epistemic games are considered epistemological resources that people use when constructing knowledge." (p. 1030)
Shultz & Gere, 2015	Hierarchical	Students' selections on a multiple-choice survey were described as naïve or sophisticated (p. 1328).	Stable	Pre-post design	Explicit	Data was collected using the Views on the Nature of Science questionnaire, which asks students directly for their beliefs.	Developmental or Dimensional	All codes consistent with developmental or dimensional model
Sinapuelas & Stacy, 2015	Hierarchical	Learning Approaches Framework consists of four levels, with Level 1 being the lowest and Level 4 being the highest (p. 797).	Stable	Authors discuss learning approach levels and shifts in level over three interviews (see p. 809).	Explicit	Students were asked about sources of knowledge and approaches to obtaining knowledge via interview questions like "How did you study? What was most helpful? Did you use [resource]?"	Developmental or Dimensional	All codes consistent with developmental or dimensional model
Talanquer, 2010	Ambiguous	Coding scheme categorized students' explanations in terms of their structures, but it is unclear whether there is a hierarchical order to the different structures.	Unstable	Author observed, "Our study revealed that students’ ability to generate causal/mechanical explanations depended on the nature of the question or task." (p. 2407)	Implicit	Students were given quizzes that asked them to construct explanations for phenomena. Explanations were coded for structure, but students were never asked about structure of explanations.	Resources	Two codes consistent with a resources model with one code not associated with any model
Venessa et al., 2019	Hierarchical	Responses were coded as Realistic, Has Merit, Naïve, and Uncategorized (p. 21-22).	Unclear	I could find no evidence on which to make a claim about stability.	Explicit	Data was collected via a survey about the nature of science and technology. See Tables 1-3 for examples of these survey items.	Developmental or Dimensional	Two codes consistent with a developmental or dimensional model with one code not associated with any model
Walker & Sampson, 2013	Hierarchical	Each component of a student's argument was rated on a scale of 0-3 where 0 = not observed and 3 = all criteria met (see p. 574). Number ratings are assumed to be hierarchical unless specifically stated otherwise.	Unclear	Authors look at change in argument quality over five timepoints. They administer a pre-test to establish a "baseline" for argument skill, which implies stability in the absence of an intervention. They also note: "Our findings, therefore, suggest that the materials supplied to students during an investigation and how the investigation is framed can influence the focus of the argumentation that ta…	Implicit	Data on argument quality was collected in the form of classroom recordings of argumentation sessions and written arguments on lab reports.	Unknown	One code consistent with developmental or dimensional model, one code consistent with resources model, and one code ambiguous
Walker et al., 2019	Hierarchical	This was more inferred than usual. Basing it off p. 442 where lack of claim change and justification were indicative of "failure" to engage in epistemic practices.	Unclear	I could find no evidence on which to make a claim about stability.	Both	Data was collected via classroom observations of argumentation sessions (implicit) and interview questions such as "How do you determine if a claim is valid or acceptable?" and "Is it okay to modifiy claims? Why or why not?" (explicit).	Unknown	Not enough information to infer a model of cognition.
Wickman, 2004	Variable utility	Discourse analysis involves interpreting how words function in the moment: "Observing what [word] stands fast hence does not primarily involve what is right and what is wrong, but what leads in the right and in the wrong direction, respectively. [...] Practical epistemologies can be used to see step by step how a more scientific understanding can be developed from different encounters and how tra…	Unstable	Author states, "As has been pointed out earlier in this paper, students’ habits are not as consistent as a theory or even as a transition state between two structures." (p. 341)	Implicit	Claims were based on observations of student dialogue as they solved chemisry problems.	Resources	All codes consistent with resources model
